# The rapid radiation of *Bomarea* (Alstroemeriaceae: Liliales), driven by the rise of the Andes

Carrie M. Tribble<sup>1,2,\*</sup>, Fernando Alzate-Guarín<sup>3</sup>, Etelvina Gándara<sup>4</sup>, Araz Vartoumian<sup>1,5</sup>, J. Gordon Burleigh<sup>6</sup>, Rosana Zenil-Ferguson<sup>2,7</sup>, Chelsea D. Specht<sup>8</sup>, and Carl J. Rothfels<sup>1,9</sup>

<sup>1</sup>University Herbarium and Department of Integrative Biology University of California, Berkeley, CA 94709, USA

<sup>2</sup>School of Life Sciences, University of Hawai'i at Mānoa, Honolulu, HI, 96822, USA

<sup>3</sup>Grupo de Estudios Botánicos (GEOBOTA) and Herbario Universidad de Antioquia (HUA), Instituto de Biología, Facultad de Ciencias Exactas y Naturales, Universidad de Antioquia, Medellín, Colombia

<sup>4</sup>Facultad de Ciencias Biológicas, Benemérita Universidad Autónoma de Puebla, Puebla, Puebla, 72570, Mexico.

<sup>5</sup>Department of Oral Biology, University of California, Los Angeles, CA 90095, USA

<sup>6</sup>Department of Biology, University of Florida, Gainesville, FL 32611 USA

<sup>7</sup>Department of Biology, University of Kentucky, Lexington KY 40506 USA

<sup>8</sup>Section of Plant Biology and the L.H. Bailey Hortorium, School of Integrative Plant Science, Cornell University, Ithaca, NY 14853 USA

<sup>9</sup>Intermountain Herbarium, Department of Biology, and Ecology Center, Utah State University, Logan, UT 84322 USA

**Abstract** Complex geological events such as mountain uplift affect how, when, and where species originate and go extinct, but measuring those effects is a longstanding challenge. The Andes arose through a series of complex geological processes over the past c. 100 million years, impacting the evolution of regional biota by creating barriers to gene flow, opening up new habitats, and changing local climate patterns. *Bomarea* are tropical geophytes with ranges extending from central Mexico to central Chile. Of the roughly 120 species of *Bomarea*, most are found in the Andes, and previous work has suggested that *Bomarea* diversified rapidly and recently, corresponding with the uplift of the Andes. While many *Bomarea* species occur over small, isolated ranges, *Bomarea edulis* occurs significantly beyond the ranges of any other *Bomarea* species (from central Mexico to northern Argentina) and is thought to have potentially human-mediated dispersal, due to its status as a pre-Columbian food plant. To untangle the potential drivers of diversification and biogeographic history in *Bomarea*, we used a target-capture approach to sequence nuclear loci of 174 accessions of 124 species, including 16 outgroup species from across the family (Alstroemeriaceae). We included 43 individuals of *B. edulis* from across its range to assess species monophyly and identify infraspecific phylogeographic patterns. We model biogeographic range evolution in *Bomarea* and test if Andean orogeny has impacted its diversification. We find that

*Bomarea* originated in the central Andes during the mid-Miocene, then spread north, following the trajectory of major mountain uplift events. Most observed speciation events occurred during the Pleistocene, while global climate cooled and oscillated and the northern Andes achieved their current form. Furthermore, we find that Andean lineages diversified faster than their non-Andean relatives. These results demonstrate a clear macroevolutionary signal of Andean orogeny on this neotropical radiation.

[keywords—Andean uplift; divergence-time estimation; evolutionary radiation; hyb-seq; Liliales; recent rapid radiation]

## Introduction

1 Beginning with the work of early naturalists, such as Alexander von Humboldt’s documentation of the turnover of  
2 plant communities over an elevational gradient in the Andes (Von Humboldt and Bonpland, 1807) and Alfred Russel  
3 Wallace’s observations on the connection between geographic barriers and species distributions (Wallace, 1863), evolu-  
4 tionary biologists have recognized the importance of geological processes on generating and maintaining biodiversity.  
5 Despite the central role of these processes in biodiversity dynamics, key methodological and empirical challenges re-  
6 main in understanding how lineages respond to events such as continental drift, large-scale climatic changes, and  
7 mountain uplift. Tropical America—one of the most biodiverse regions on the planet—provides a key opportunity to  
8 study these interactions. Specifically, Andean uplift, which has created abiotic barriers and opened up novel habitats,  
9 is thought to be one of the main drivers of rapid radiations leading to high species-richness and endemism (Koscinski  
10 et al., 2008; Guayasamin et al., 2017; Ceccarelli et al., 2016; Ribas et al., 2007; Chazot et al., 2018; Lisa De-Silva et al., 2017;  
11 Madriñán et al., 2013; Lagomarsino et al., 2016; Hughes and Eastwood, 2006). However, tropical regions worldwide,  
12 including tropical America, are understudied when compared to temperate regions (Collen et al., 2008; Titley et al.,  
13 2017), and the evolutionary histories of many tropical American clades are unknown (Pérez-Escobar et al., 2022). With-  
14 out detailed and reliable phylogenies, accurate inference of the effect of geological events on evolutionary processes is  
15 impossible. In this study, we built the first well-sampled phylogeny of the primarily Andean plant genus *Bomarea* Mirb.  
16 and modeled how this clade has spread across South America in the context of tectonic movements, climatic change,  
17 and Andean uplift.

18 The Andes is over 9000 kilometers long and its tallest mountain (Aconcagua in Argentina) reaches 6962 meters  
19 above sea level, second only to Asian mountains such as the Mount Everest in the Himalayas (Graham, 2009). The  
20 emergence of the Andes occurred over the past ~100 million years (myr) through geologically complex uplift that  
21 modified continent-scale topography, climate, watersheds, habitats, and, correspondingly, biota (Graham, 2009; Hoorn  
22 et al., 2010; Pérez-Escobar et al., 2022). The tropical Andes is a global biodiversity hotspot with roughly 20,000 endemic  
23 plant species and 1,557 endemic vertebrate species (Myers et al., 2000). While evolutionary diversity peaks at mid  
24 elevations in the Andes (Griffiths et al., 2021), high-elevation habitats have high rates of endemism and lineages that are  
25 often marked by fast rates of evolution, perhaps due to the recent emergence of such habitats or to increased mutation  
26 rates caused by high UV exposure (Madriñán et al., 2013). Uplift began in the southern Andes and spread north; thus,  
27 the northern Andes are the youngest and most topographically complex part of the range, while the southern Andes  
28 reach higher elevations (Graham, 2009; Hoorn et al., 2010; Pérez-Escobar et al., 2022). Over this period, the rise of the  
29 Andes affected regional and global climate by creating a steep precipitation gradient from west (dry) to east (moist)  
30 across South America and by sequestering CO<sub>2</sub> through increased erosion of exposed silicate rock, which contributed  
31 to global cooling during the late Cenozoic (Graham, 2009). Andean orogeny led to the creation and then drainage of a  
32 massive wetland (Pebas system) over much of the current extent of the Amazon basin (Hoorn et al., 2010). Mountain-

33 building also opened up novel tropical alpine habitat, allowing for the emergence of new ecosystems like paramo and  
34 puna (Madriñán et al., 2013; Pérez-Escobar et al., 2022), and increased topographic complexity through the formation  
35 of mountain peaks and deep river valleys that shape spatial biodiversity patterns (Hazzi et al., 2018).

36 There are three primary patterns of spread and colonization in Andean clades; these patterns have different impli-  
37 cations for how uplift may have affected the biodiversity dynamics of local biota. First, clades may have spread from  
38 north (North or Central America) to south, dispersing over the oceanic gap between Central and South America or via  
39 the Isthmus of Panama after its formation. Since the northern Andes is the youngest part of the Cordillera, north-to-  
40 south clades with strictly montane distributions likely arrived to the Andes once northern South America had already  
41 sustained significant mountain building activity. These clades may subsequently disperse south along the already-  
42 formed Andean chain. The contribution of northern-temperate flora to the current composition of high-elevation An-  
43 dean ecosystems has been discussed by several previous studies (Sklenář et al., 2011; Simpson, 1975; Bacon et al., 2018).  
44 Notably, the plant genus *Lupinus* (Fabaceae) arrived to the Andes from North America and then radiated, demonstrat-  
45 ing extremely high rates of speciation and morphological change over a very short time period (1.18–1.76 myr; Hughes  
46 and Eastwood, 2006). Additionally, *Gentianella* (Gentianaceae) is hypothesized to have dispersed from North America  
47 to northern South America after the emergence of alpine conditions and likely also the formation of the Isthmus of  
48 Panama (von Hagen and Kadereit, 2001). This pattern implies that the taxa did not evolve as the Andes formed; rather,  
49 they dispersed through and/or adapted to existing Andean habitats.

50 Second, clades may have originated in the south (southern South America) and spread northward, following the  
51 emergence of high-elevation habitats as the Andes formed. This pattern appears to be less common (at least in botanical  
52 systems) than north-to-south dispersal (Bacon et al., 2018). However south-to-north dispersal is evident in the iconic  
53 Andean *Puya* (Bromeliaceae), which originated in modern-day Chile and spread north, presumably as suitable habitat  
54 emerged during Andean uplift (Jabaily and Sytsma, 2013). *Chiquiraga* (Asteraceae) also originated in southern South  
55 America, subsequently spreading north (Ezcurra, 2002), and Lagomarsino et al. (2016) hypothesize a similar pattern  
56 underlies the centropogonid radiation in Andean cloud forests. Other examples include *Gunnera* (Bacon et al., 2018)  
57 and wax palms (*Ceroxylon*, Sanín et al., 2016). This pattern is reminiscent of the progression rule of island biogeography,  
58 in which clades first arrive to older islands and spread to newer ones as they are formed (as exemplified by many  
59 Hawaiian taxa: Hennig, 1966; Funk and Wagner, 1995). This pattern implies that the geological history of Andean  
60 uplift had measureable impacts on how, when, and where species formed.

61 Third, clades may have diversified in-situ, adapting to higher elevation habitats as they emerged and/or forming  
62 new species in response to increased topographic complexity and new dispersal barriers. High-elevation species also  
63 experience greater dispersal barriers, as their preferred habitats—high mountain peaks—are often enmeshed within a  
64 lower elevation matrix, creating an island-like system. For example, Ceccarelli et al. (2016) conclude that Andean uplift  
65 generated new habitats, which promoted adaptation and specialization to harsh, high-elevation habitats, and created  
66 dispersal barriers between high-elevation habitats, in *Brachistosternus*, a genus of scorpions. Andean uplift also affected  
67 the distributions and diversification of parrots (*Pionus*, Ribas et al., 2007). *Pionus* originated in lowland South America

68 prior to Andean uplift. The Andes then split the clade into three clades: distinct highland (in the Andes), dry lowland  
69 (west of the Andes), and wet lowland (east of the Andes) lineages. Subsequently, climatic oscillations in the Pleistocene  
70 invigorated speciation in the highland parrots.

71 Distinguishing between these patterns requires accurate phylogenies on which to base comparative analyses, and  
72 yet recent rapid radiations introduce complex challenges for phylogenetic inference (Giarla and Esselstyn, 2015). Specif-  
73 ically, recent rapid radiations are characterized by rapid consecutive phylogenetic divergences—and thus very short  
74 internal branches. These branches are difficult to resolve due to the combined effects of low signal (there is little time  
75 for substitutions to accumulate) and rampant incomplete lineage sorting (ILS; Maddison, 1997). These challenges are  
76 exacerbated when working with non-model organisms with limited genomic resources, as it may not be possible to  
77 generate information about the variability of gene regions across individuals/species, or the presence of recent gene  
78 duplications that could affect homology inference, prior to sequencing.

79 In this study, we illustrate solutions to these challenges using *Bomarea*—a recent and rapid Andean radiation—  
80 target-capture approaches to data generation, and an analytical pipeline focused on the homology issues inherent  
81 in recent rapid plant radiations. We estimate the first well-sampled phylogeny of *Bomarea* and demonstrate how to  
82 recover and evaluate informative loci from universal probe sets, despite high rates of gene duplication and rapid recent  
83 divergences. We then infer divergence times and model the biogeographic history and diversification rates of the clade  
84 in the context of climatic and geological changes in South America over the past 80 million years. Our study thus  
85 adds to the current understanding of how the shifting tropical and southern American landscape contributed to the  
86 extremely high rates of extant species richness.

## 87 *Bomarea*

88 *Bomarea* is one of four genera in Alstroemeriaceae (Liliales), and comprises roughly 120 described species, most of which  
89 occur in cloud forests and tropical alpine habitats such as paramo and puna regions throughout the Andean cordillera  
90 (Hofreiter, 2005; Alzate et al., 2008b). While many *Bomarea* are perennial twining vines, some species—mostly those that  
91 occur in alpine habitats above the tree line—are erect or suberect perennial herbs (Fig. 1; Alzate Guarín, 2005). Each  
92 above-ground stem senesces after flowering, and below-ground stems (rhizomes) and tuberous roots fuel the regrowth  
93 of subsequent above-ground structures (Tribble et al., 2021a,b).

94 Alstroemeriaceae likely originated in the late Cretaceous when Australasia (Australia and New Zealand), Antarc-  
95 tica, and southern South America were very close or still physically connected (Chacón et al., 2012). Of the four genera  
96 in Alstroemeriaceae, *Bomarea* and sister genus *Alstroemeria* are restricted to the Americas while two other genera occur  
97 in Australasia: *Luzuriaga* occurs in southern South America and New Zealand, and *Drymophila* is restricted to Australia.  
98 *Bomarea* occurs from Chile and Argentina to Mexico and the Caribbean (Alzate et al., 2008a). While many species have  
99 highly restricted ranges, *Bomarea edulis* (Tussac) Herb. is found throughout the entire range of *Bomarea*. Furthermore,  
100 *B. edulis* is the only species of *Bomarea* in the Caribbean, the northern-most occurring species in central Mexico, the

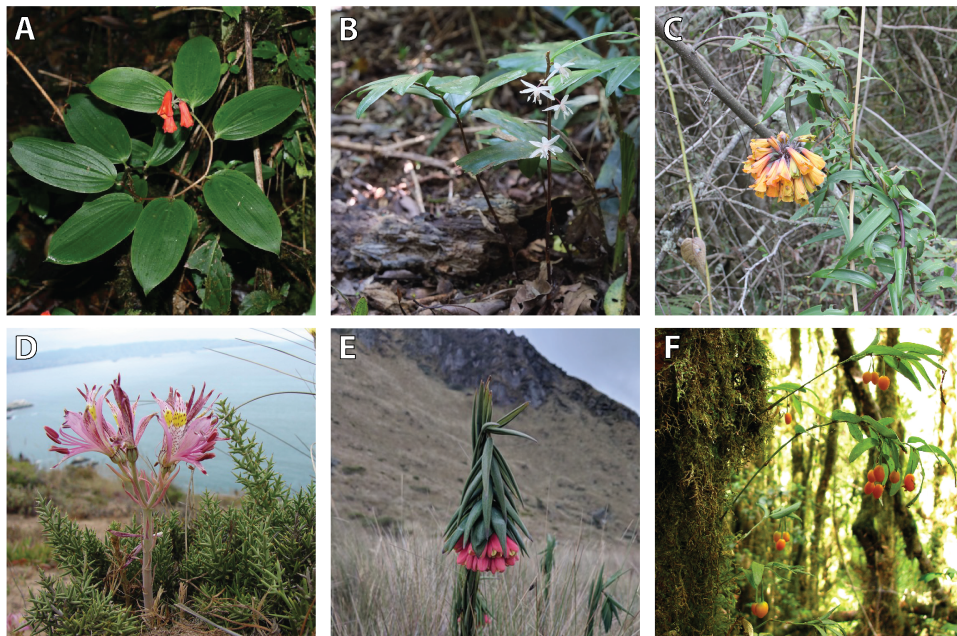

**Figure 1:** Species in Alstroemeriaceae: (A) *Bomarea suberecta*, photo: Robbin Moran; (B) *Drymophila moorei*, photo: Igor Makunin; (C) *Bomarea multiflora*; (D) *Alstroemeria hookeri*, photo: Patricio Novoa Quezada; (E) *Bomarea glaucescens*, photo: iNaturalist user fishy21, and; (F) *Luzuriaga radicans*, photo: Inao Vasquez.

101 only species in Brazil, and its populations in northern Argentina extend the range of the genus to the south. Substan-  
102 tial morphological variability across its range led to the recognition of at least 23 species within *B. edulis*. However,  
103 current taxonomies reduce these all to synonymy under *B. edulis* (Hofreiter, 2006). This species produces edible tu-  
104 bers and was previously cultivated (Hofreiter, 2006), leading to the hypothesis that its wide distribution might be due  
105 to human-mediated dispersal. Despite this taxonomic and biogeographic confusion, no previous study has gathered  
106 molecular data to examine relationships within *B. edulis*, including determining if *B. edulis* is monophyletic. If “*B. edulis*”  
107 as currently circumscribed does indeed encompass several morphologically similar species, then the geographic range  
108 of those species and their placement within the *Bomarea* phylogeny could greatly influence biogeographic inference  
109 within the genus. Conversely, if *B. edulis* is in fact a single monophyletic species, then placing that species within the  
110 *Bomarea* phylogeny will facilitate modeling its range expansion in the context of biogeographic movements across the  
111 group.

112 Our current understanding of the *Bomarea* phylogeny derives largely from Alzate et al. (2008a) and from Chacón  
113 et al. (2012), which also addressed biogeographic patterns in *Bomarea*. However, Chacón et al. (2012) did not reconstruct  
114 the finer-scale movements of species in *Bomarea*, and relationships within the genus—including of the single sampled  
115 *B. edulis* individual—were highly uncertain. This was likely due to the lack of variable markers, which has also limited  
116 other previous attempts to reconstruct the genus’ phylogeny (e.g., Alzate et al., 2008a). Several previous studies have  
117 hypothesized that *Bomarea* evolved in the context of recent Andean uplift because of the tendency of species to thrive

118 in montane regions and because the center of species diversity is in the central Andes (Alzate et al., 2008a; Hofreiter,  
119 2007). Additionally, Chacón et al. (2012) found that *Bomarea* diversified beginning 14.3 million years ago (Ma) during a  
120 period of ongoing Andean orogeny. However, sparse taxon sampling and limited taxonomic resolution prevented the  
121 authors from addressing biogeographic dynamics in the genus.

## 122 **Materials and Methods**

### 123 **Sample Collection and Sequencing**

124 We obtained samples from 192 individuals from silica-dried and herbarium-sampled material (Table S1). These samples  
125 represented 174 *Bomarea*, 14 *Alstroemeria*, two *Drymophila*, and three *Luzuriaga* individuals comprising 137 different  
126 species. We extracted DNA from all samples using a standard CTAB protocol (Doyle, 1991). For the target enrichment,  
127 we used the GoFlag angiosperm 408 probes, which cover 408 relatively conserved exons that are found in a total of  
128 226 single or low copy nuclear genes Endara and Burleigh (2022). The library preparation, target enrichment, and  
129 sequencing were all done by RAPiD Genomics (Gainesville, FL) using protocols described in Breinholt et al. (2021) and  
130 Endara and Burleigh (2022) (see Supplemental Section 1.1 for details). Samples were sequenced on an Illumina HiSeq  
131 3000 with 100 base-pair (bp) paired-end reads.

### 132 **Data Processing**

133 We assembled multiple sequence alignments from the target regions using the bioinformatic pipeline described in  
134 (Endara and Burleigh, 2022), which modified the pipeline from Breinholt et al. (2021) for angiosperms. This pipeline  
135 conducts a de novo assembly with BRIDGER version 2014-12-01 (Chang et al., 2015) based on sequence homology of raw  
136 reads to a set of reference sequences for each locus. We aligned the recovered sequences from the target regions only  
137 from each locus using MAFFT version 7.425 (Katoh and Standley, 2013) and merged any isoforms from the same taxon  
138 with heterozygous sites a Perl script that used IUPAC ambiguity codes to represent sites with multiple nucleotides. This  
139 pipeline does not explicitly phase loci; however, in some cases, a locus alignment might include multiple sequences  
140 from some samples, representing cases in which the BRIDGER assembler identified what is likely more than allelic  
141 diversity. We discarded all by-catch and aligned only targeted regions, and not flanking sequences, to minimize missing  
142 data and misaligned regions. For all loci, we retained all recovered copies per individual.

143 We then further processed the alignments to remove possible contaminants, minimize missing data, and address  
144 homology issues within loci. We performed all downstream processing in R (v4.1.0, R Core Team, 2013) unless otherwise  
145 noted. We first discarded loci that were recovered from fewer than a third (57) of all individuals. We then built gene trees  
146 of the remaining loci with IQtree (Nguyen et al., 2015) using ModelFinder (Kalyaanamoorthy et al., 2017) to identify  
147 the best nucleotide model. We manually inspected all gene trees to check for possible contaminant sequences—those  
148 that were on long branches or from ingroup individuals that fell with the outgroup. We then blasted (blastn, Altschul

149 et al., 1990) each potential contaminant sequence and removed those whose best blast hit was not another monocot. We  
150 then re-built all gene trees using the same method as above.

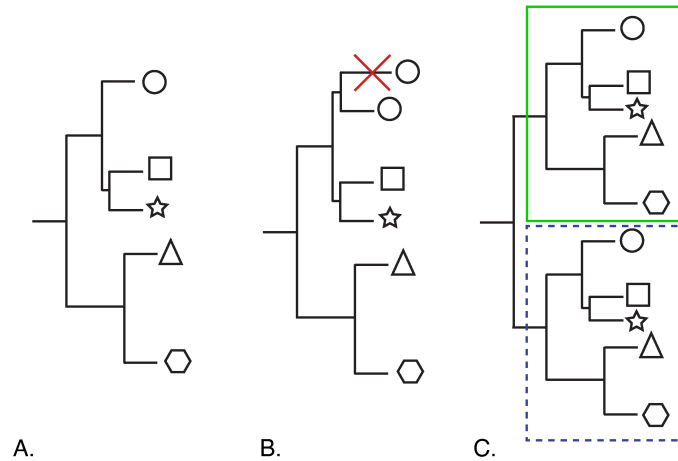

**Figure 2:** Possible patterns of putative gene duplication (hereafter, gene duplication) in loci. Shapes at tips represent individuals. (A) No gene duplicates in the locus—all tips represent unique individuals. (B) Local gene duplication—duplicates monophyletic. (C) Ancestral gene duplication—locus can easily be split into two clades within which tips represent unique individuals.

151 For those gene trees retaining some multiple copies per individual for at least some loci after the “decontamination”,  
152 above, we manually inspected each tree and attempted to resolve each case of multiple copies per individual. We first  
153 determined if the duplicated loci appeared due to putative gene duplication across all individuals—, gene duplication  
154 of only a few individuals, or impossible to determine (see Fig. 2). For gene duplication events across all or most  
155 individuals, we split the tree into multiple reciprocally monophyletic clades (Fig. 2 A). For gene duplication of only  
156 a few individuals, we retained no more than one sequence per individual by removing one sequence randomly if tips  
157 were sister (Fig. 2 B) or removing both if placement was uncertain. For any indeterminate case we removed the locus  
158 entirely. We then reflected all changes to the gene trees onto the original alignments; we split alignments if we had  
159 identified multiple orthologous clades in the gene trees and we removed all sequences from alignments that we had  
160 removed from the gene trees. Finally, we removed any individual from an alignment if it had less than 10% matrix  
161 occupancy (more than 90% missing data). All downstream analyses were performed on these cleaned alignments.

## 162 Phylogenetic Reconstruction

163 We inferred phylogenetic relationships using two methods: a “species tree” methods based on an approximate mul-  
164 tispecies coalescent approach (A-MSc)—ASTRAL-II (Zhang et al., 2018)—and one maximum likelihood concatenate  
165 supermatrix approach implemented in IQtree (Nguyen et al., 2015).

166 For the A-MSc analysis, we built gene trees of each locus, again using IQtree with 100 standard bootstrap repli-  
167 cates, and using ModelFast to infer the best nucleotide model for each locus. We collapsed all nodes with < 10%



168 bootstrap support in each gene tree and ran ASTRAL-II with default settings, treating each individual as its own species  
169 (*i.e.*, as a tip in the resulting phylogeny).

170 For the ML analysis, we concatenated all loci and used PartitionFinder 2 (Lanfear et al., 2017) to determine the  
171 best configuration of partitions given the option to partition by locus and by codon position and the best nucleotide  
172 evolution model(s) for those partitions. We used AICc (Bedrick and Tsai, 1994) for model selection and performed a  
173 greedy search. We used the inferred partitioning scheme and models for ML analysis with IQtree, implemented on the  
174 CIPRES computing platform (Miller et al., 2011). We also ran 1,000 ultrafast bootstrap replicates (Hoang et al., 2018).

175 Given the short divergences between many nodes in the trees, ILS may be an important process, and thus we used  
176 the A-MSc topology from the ASTRAL-II analysis for all subsequent analyses.

## 177 Divergence-Time Estimation

178 We dated the A-MSc topology in RevBayes (Höhna et al., 2014) using an exponential relaxed clock model, birth-  
179 death tree prior, and a partitioned GTR +  $\Gamma$  model of nucleotide substitution. Running the divergence-time estimation  
180 (DTE) on the full set of loci was not computationally feasible, so we used the R script genesortR (Mongiardino Koch,  
181 2021) to select a set of 15 loci; we partitioned these data by locus and codon position for a total of 45 subsets. In  
182 genesortR we defined the ingroup as *Alstroemeria* plus *Bomarea*, only considered loci with >10% of ingroup termi-  
183 nals, removed outliers (1% of loci that differ most in PCA-space), and set `topological_similarity` to “true” (see  
184 [hrefhttps://github.com/mongiardino/genesortR](https://github.com/mongiardino/genesortR) for more details on these parameters). genesortR sorts remaining  
185 loci by a PCA axis of “phylogenetic usefulness” that takes into account potential biases (*e.g.*, average pairwise patristic  
186 distance) and potential beneficial qualities (*e.g.*, average bootstrap support); we then selected the top 15 loci.

187 Our birth-death prior on the tree assumes tips represent species—the result of a dichotomous speciation and ex-  
188 tinction process. To accommodate this assumption, if a species was represented by a multiple tips forming a clade, we  
189 selected one tip at random and removed the others. When tips identified as the same species were not monophyletic,  
190 we kept one random representative of each clade.

191 Because the RevBayes DTE analysis requires a starting tree that has a non-zero probability given the node calibra-  
192 tions (Table 1), we first dated the A-MSc topology using penalized likelihood in R with the `chronos()` function from  
193 the `ape` package (R Core Team, 2013; Paradis and Schliep, 2019). We then used this chronogram as the starting tree in  
194 our subsequent relaxed-clock analysis in RevBayes.

**Table 1:** Calibrations and constraints used for divergence-time estimation. Normal soft-bound uniform distribution refers to a prior distribution on parameter values, where each “end” of the uniform distribution ends with a half-normal distribution rather than an abrupt change in probability (similar to Yang and Rannala, 2006). More details are available in RevBayes code on GitHub.

| Node                      | Age (Ma)  | Prior Distribution   | Calibration Type                    |
|---------------------------|-----------|----------------------|-------------------------------------|
| Luzuriageae crown         | 23.2      | Lognormal            | Fossil from Iles et al. (2015)      |
| <i>Bomarea</i> crown      | 7.1–23.1  | Soft-bounded uniform | Secondary from Chacón et al. (2012) |
| <i>Alstroemeria</i> crown | 11.2–26.8 | Soft-bounded uniform | Secondary from Chacón et al. (2012) |
| Alstroemeriodeae crown    | 18.2–42.6 | Soft-bounded uniform | Secondary from Chacón et al. (2012) |
| Alstroemeriaceae root     | 23.2–150  | Uniform              | Secondary from Chacón et al. (2012) |

195 We calibrated the tree using one fossil calibration and three secondary calibrations from the most recent family-  
196 level analysis (Table 1, also see Chacón et al., 2012). We checked for convergence of estimated branch lengths and ages  
197 using Gelman and Rubin’s convergence diagnostic as implemented in R with the `gelman.diag()` function in the CODA  
198 package (Gelman and Rubin, 1992; Plummer et al., 2006).

199 To investigate the relative influence of molecular and fossil data on estimated node ages, we also ran a series of  
200 analyses. First, we ran the analysis under the “tree prior” with no calibrations (fossil or secondary) or molecular data,  
201 only our prior specifications on the tree (including a prior on the root age). We then ran the analysis without any  
202 molecular data but including the age of the fossil and secondary node calibration. Including these node calibrations  
203 represents a “calibration density”, which represents the amount of information about ages contained in the calibration  
204 densities alone.

## 205 Biogeographic Range Reconstruction

206 We estimated biogeographic ranges at two taxonomic scales. First, we reconstructed the history across the full family-  
207 level dataset including the samples in Luzuriageae and *Alstroemeria*. To examine finer-scale patterns within *Bomarea*  
208 we also performed biogeographic reconstruction at on a *Bomarea*-only tree. We performed both analyses in RevBayes  
209 using a Dispersal-Extinction-Cladogenesis model of range evolution (Ree and Smith, 2008) over the maximum clade  
210 credibility (MCC) tree from the DTE as well as over a sample of 100 trees from the DTE posterior.

### 211 Alstroemeriaceae

212 We coded biogeographic ranges based on distribution data from the World Checklist of Selected Plant Families (WCSP,  
213 2020). We then recoded species into five broad biogeographic regions: Australasia (Australia and New Zealand), south-  
214 ern South America (Chile, Argentina, and Uruguay), eastern South America (Guyana Shield and Brazil), the northern/  
215 central Andean region (Bolivia, Peru, Ecuador, Colombia, and Venezuela, hereafter “Andean”), and Central America  
216 including Mexico and the Caribbean. We allowed a lineage to occupy no more than three areas simultaneously and  
217 only allowed dispersal into physically adjacent areas. Dispersal into and out of Australasia was allowed only through  
218 southern South America, as those regions were physically connected through Antarctica during the Cretaceous, and

219 thus represents the most likely mode of transition between these currently-disconnected regions. We specified one  
220 dispersal rate and one extirpation rate irregardless of area.

## 221 *Bomarea*

222 As no *Bomarea* occur outside of the Americas, we did not include Australasia in the *Bomarea*-specific analysis. Instead,  
223 we distinguished between northern (Ecuador, Colombia, and Venezuela) and central (Peru and Bolivia) Andean re-  
224 gions. Similar to the full Alstroemeriaceae analysis, we also included Central America, eastern South America, and  
225 southern South America regions. We allowed lineages to occupy up to five areas simultaneously. As above, we only  
226 allowed dispersal through physically connected areas and we estimated one rate of dispersal and extirpation.

## 227 **Diversification-Rate Estimation**

228 We estimated branch-specific net-diversification rates across *Bomarea* using a birth-death model that allows speciation  
229 and extinction rates to shift across the tree (Höhna et al., 2019). Our sampling of species within Alstroemeriaceae is  
230 heterogeneous across the family; the ratio of sampled species to known total species is much lower for *Alstroemeria*  
231 than for the other genera. To ensure that this discrepancy did not affect our rate estimates, we ran the analysis only on  
232 the *Bomarea* subtree (same phylogeny as used in the *Bomarea*-only biogeographic model).

233 We summarized the average diversification rate in Andean vs. non-Andean nodes. For each generation of the  
234 biogeographic *Bomarea*-only model, we classified the nodes as either Andean (end-state either central Andean, north-  
235 ern Andean, or both central and northern Andean) or non-Andean. We then selected a random generation from the  
236 branch-specific diversification rate analysis and recorded the sampled speciation and extinction rates for Andean and  
237 non-Andean nodes. We then calculated the average net-diversification rate (*speciation* – *extinction*) as the mean of  
238 sampled rates for the Andean nodes vs. non-Andean nodes and compute the difference. Once we had performed this  
239 calculation for all biogeographic model generations, we calculated the difference between Andean and non-Andean  
240 rates per generation. This difference, *d* represents the degree to which Andean nodes diversity faster, averaged over  
241 the uncertainty in biogeographic ancestral state estimates, assignment of rate categories to nodes, and speciation and  
242 extinction values of the rate categories.

243 We used Bayes factors to quantify the support for faster diversification rates in Andean lineages. The Bayes factor  
244 is computed as:

$$BF = \frac{P(M | X)}{1 - P(M | X)} \div \frac{P(M)}{1 - P(M)}$$

245 where  $P(M)$  is the prior probability that Andean lineages diversify faster, and  $P(M | X)$  is the posterior probability  
246 that Andean lineages diversify faster. We compute the posterior probability ( $P(M | X)$ ) as:

$$P(M | X) = d_{pos} / n,$$

247 where  $d_{pos}$  is the number of differences that are greater than zero ( $d > 0$ ) and  $n$  is the total number of differences  
248 (number of samples). Further, we assume the prior probabilities that Andean lineages diversify faster or slower are  
249 equal, *i.e.*,  $P(M) = 1 - P(M)$ , so that the Bayes factor is:

$$2 \ln BF = 2 \ln \left[ \frac{P(M | X)}{1 - P(M | X)} \right]$$

250 Positive values of  $2 \ln BF$  indicate support for faster Andean diversification.

## 251 Plotting and R packages

252 We used `RevGadgets` (Tribble et al., 2022), `ggtree` (Yu et al., 2017), `ggplot2` (Wickham, 2011), and `maps` (Deckmyn et al.,  
253 2021) to plot results in R. We edited some figures with Adobe Illustrator.

## 254 Data and Code Availability

255 All code is available on GitHub at [https://github.com/cmt2/bom\\_phy\\_analysis](https://github.com/cmt2/bom_phy_analysis). All data is available on Dryad at  
256 [XXXXX] and NCBI SRA [XXXXXX].

## 257 Results

### 258 Data Processing

259 Of the 192 individuals we extracted and submitted for sequencing, we obtained sequence data for some of the target  
260 loci from 172. Among these samples, the number of loci recovered ranged from one to 371, with an average of 146.6,  
261 and a median of 123. Across all samples, we recovered some sequence data from 403 of the 408 loci, 228 of which had  
262 sequence data from more than a third of the accessions. Of these 228, 56 had some accessions with multiple copies in  
263 that locus. After gene-tree inspection (Fig. 2), we removed 11 of those 56 from the analysis. We kept 30 after removing  
264 duplicate accessions (Fig. 2B), and we split 15 into multiple alignments (Fig. 2C).

265 We removed sequences from 161 loci of 54 accessions due to contamination: a total of 301 sequences. These se-  
266 quences blasted to a variety of non-monocot taxa: 14 Enterobacterales, 1 Rhodospirillales, 12 fungi, 249 non-monocot  
267 plants, and 25 with no BLAST hits. The 5 most common contaminant genera were *Solanum* (tomato and relatives, 87  
268 sequences), *Rosa* (rose and relatives, 55 sequences), *Fragraria* (strawberry and relatives, 22 sequences), and *Vitis* (grape  
269 and relatives, 7 sequences). We removed three accessions entirely, as they appeared contaminated in most gene trees  
270 (*B. macusani*, *B. huanuco*, and *B. schlerophylla*).

271 After these data cleaning steps, the final dataset included 121 accessions of 221 loci; when concatenated, the matrix  
272 contains 43,218 base pairs with 33.5% gaps.

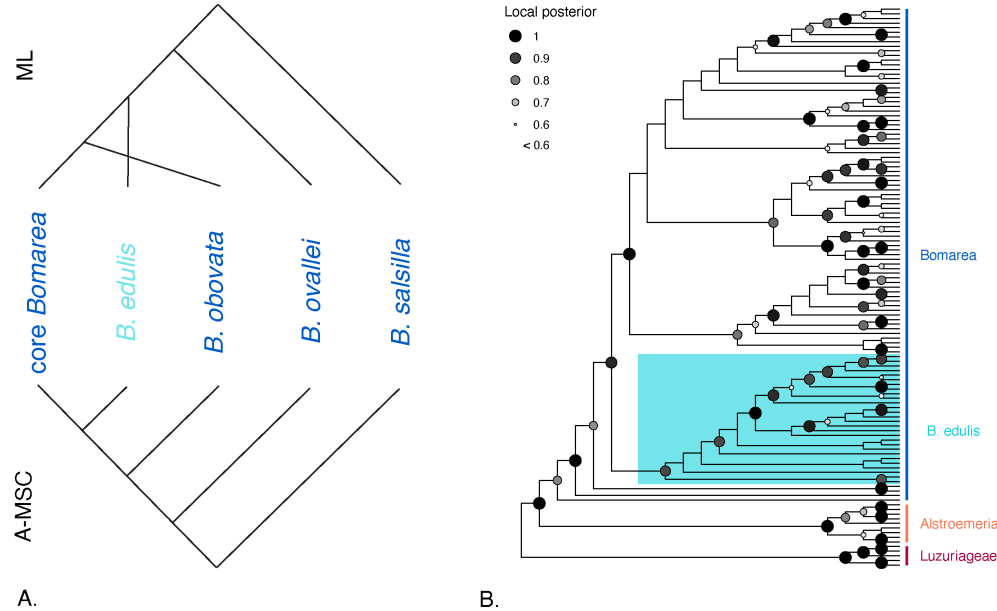

**Figure 3:** Topologies from species tree inference. (A) Topologies produced by Maximum Likelihood (ML) inference (concatenation) in IQtree (top) and by approximate multispecies coalescent (A-MSc) approaches in ASTRAL-II and SVDq. (B) Cladogram of Alstroemeriaceae showing broad relationships as inferred by ASTRAL-II.

## 273 Phylogeny of *Bomarea*

274 We find strong support for monophyletic genera and for the currently accepted genus-level relationships in both A-  
275 MSC and ML trees: *Bomarea* and *Alstroemeria* are sister to each other (Alstroemeriodeae), *Luzuriaga* and *Drymophila* are  
276 sister to each other (Luzuriageae), and the two subfamilies are also sister (Fig. 3). Within *Bomarea*, we infer a backbone  
277 topology where *Bomarea salsilla* Vell., *B. ovallei* (Phil.) Ravenna, *B. obovata* Herb., and *B. edulis* form a grade sister to  
278 the rest of *Bomarea* (core *Bomarea*). However, the approximate coalescent method (ASTRAL-II—Fig. S1 vs. the ML  
279 concatenated tree (Fig. S2) differ in the inferred order of the grade: in the approximate coalescent result *B. edulis* is  
280 sister to core *Bomarea* while in the ML results *B. obovata* is sister to core *Bomarea* (summarized in Fig. 3A). This major  
281 topological difference may indicate that ILS is prevalent in these data (see Discussion).

282 We find strong support for a clade of most *B. edulis* individuals (Fig. 3, also true in the ML inferences—Fig. S2),  
283 though some individuals identified as *B. edulis* fall elsewhere (see Discussion). Despite strong support for the major  
284 relationships in the phylogeny, support remains low in several parts of the tree, in particular within core *Bomarea* at  
285 mid-aged nodes (local posteriors = 0.3–0.5, Fig. 3) and for many relationships within *B. edulis*.

286 Because of a well-supported ( $pp = 0.88$ ) divergence between two Argentinian individuals of *B. edulis* and the  
287 rest of the species' clade (Fig. S1), we suspect that the Argentinian population may represent a separate species. We  
288 thus include two *B. edulis* individuals in the phylogeny for downstream DTE, biogeographic, and diversification rate  
289 estimation analyses: one individual from Argentina and one from Mexico.

## Untangling *Bomarea*

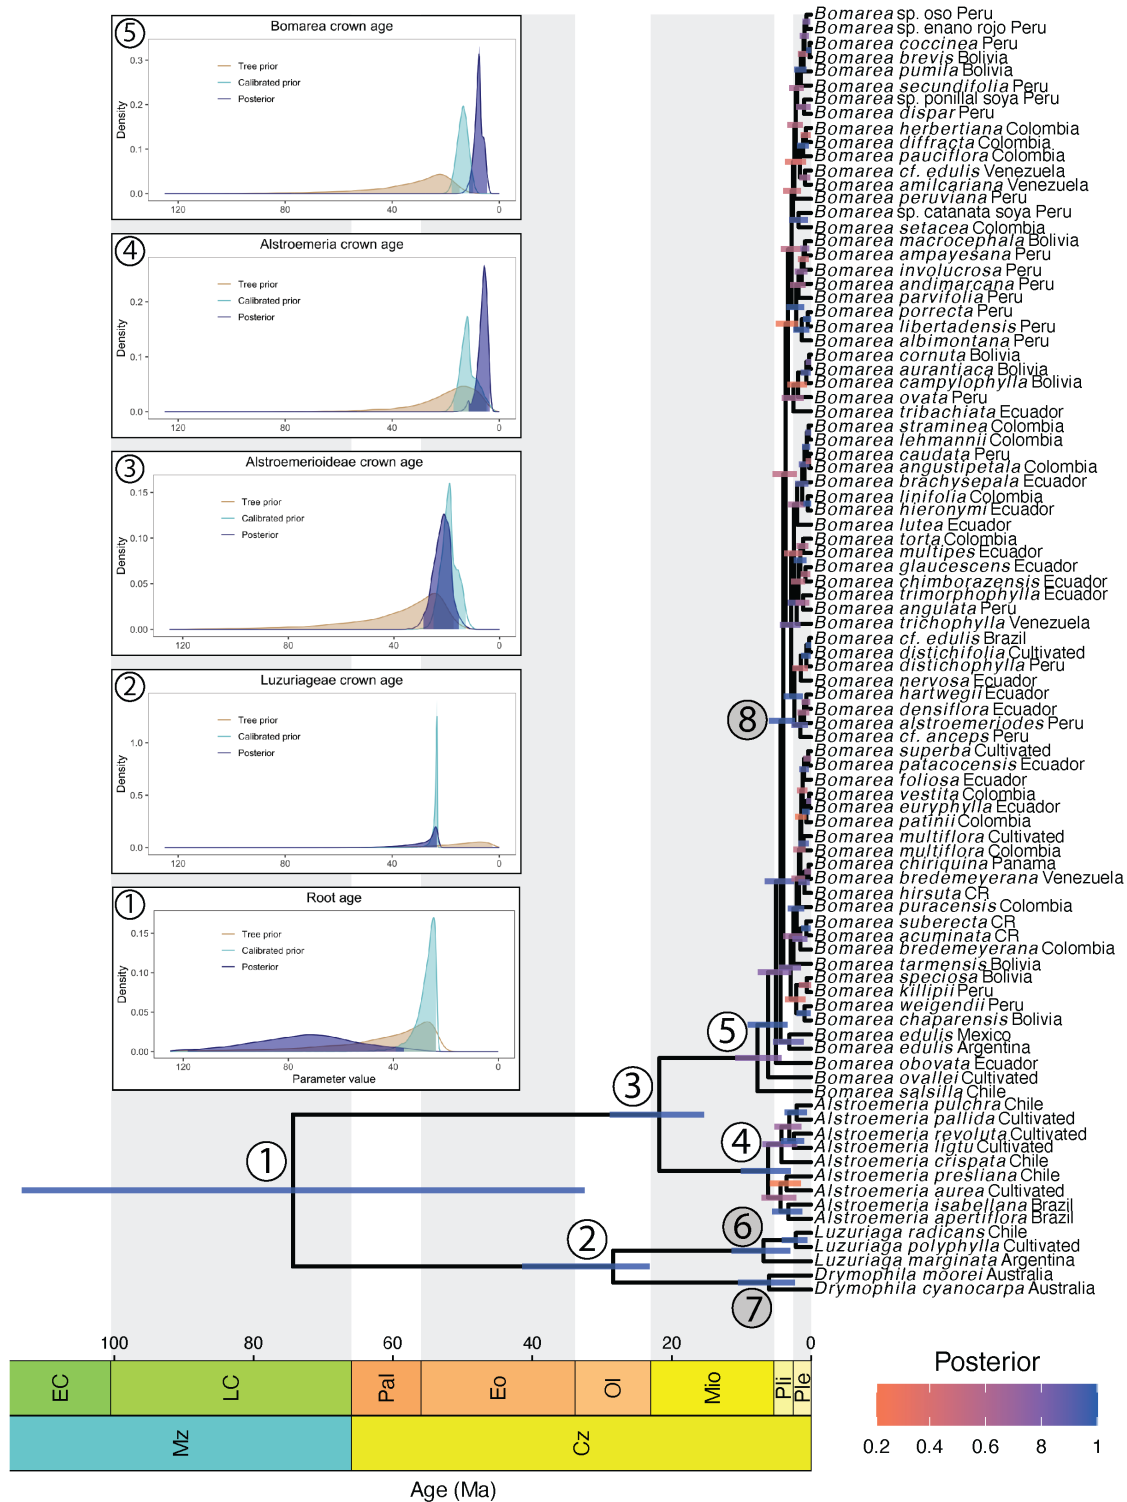

**Figure 4:** Chronogram of Alstroemeriaceae. Geological timescale shows age in millions of years ago (Ma). Node bars represent the 95% HPD for node ages. Color of the node bars indicates local posterior probability of nodes in the phylogeny (from ASTRAL-II analysis). Red asterisks indicate the four calibrated nodes. The four inset charts correspond to these calibrated nodes. In the insets, three probability distributions correspond to the ages estimated from the tree prior, calibrated prior (when the calibration ages are incorporated), and the posterior (when molecular data and calibration ages is incorporated).

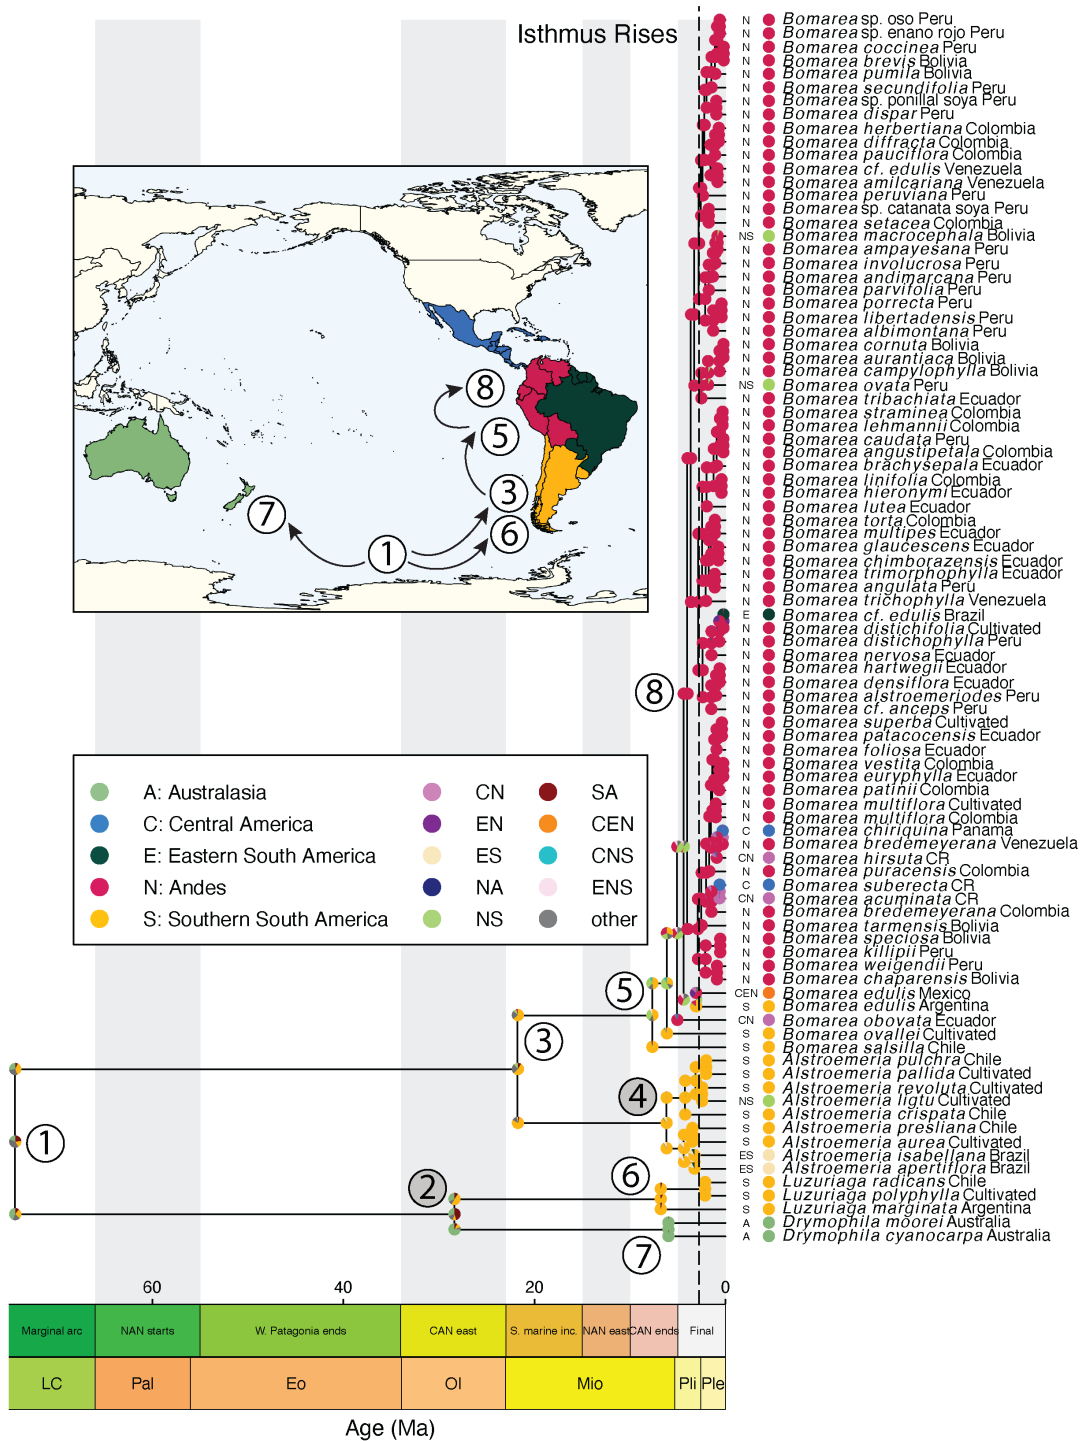

**Figure 5:** Chronogram of Alstroemiaceae showing estimated ancestral reconstruction of biogeographic ranges. Pie charts at nodes show the top three most probably ancestral states (color of the slices) and their corresponding posterior probabilities (size of the slices). The inset map shows major biogeographic events and numbers correspond to node numbers (in white circles) labeled on the phylogeny. If node numbers are in grey circles, they are not shown on the map. The geological timescales show (top) the major events of Andean uplift (from Pérez-Escobar et al., 2022) and (bottom) the relevant geological epochs. The vertical, dashed line represents an estimate for the rise of the isthmus of Panama (2.8 myr, O’Dea et al., 2016).

## 290 Divergence-time Estimation

291 Our DTE analysis infers a posterior mean estimation for the divergence of *Bomarea* and *Alstroemeria* (node 1 in Fig. 4) at  
292 73.47 million years ago (Ma), during the Late Cretaceous. However, the 95% highest posterior density (HPD) interval  
293 for this node is broad (113.23–32.53 Ma), indicating considerable uncertainty in this estimate. Subsequently, *Luzuriaga*  
294 and *Drymophila* (node 2 in Fig. 4) diverged at 28.40 Ma (23.2–41.44) in the Oligocene and *Alstroemeria* and *Bomarea* (node  
295 3 in Fig. 4) diverged at 21.76 Ma (15.34–28.89) during the early Miocene.

296 We date the crown age of *Alstroemeria* (node 4 in Fig. 4) at 6.20 Ma (2.91–10.09 Ma) and the crown age of *Bomarea*  
297 (node 5 in Fig. 4) at 7.69 Ma (4.26–10.87 Ma), both in the Miocene, though our estimate of the *Alstroemeria* crown age  
298 may be biased (towards younger values) by the discrepancy between our highly-sampled *Bomarea* clade and less well-  
299 sampled *Alstroemeria* clade—it is possible that sample does not capture the crown node. Core *Bomarea* (node 8 in Fig.  
300 4) likely began to diversify 4.41 Ma in the Pliocene (2.31–6.05 Ma).

301 We find that for nodes 4 and 5, both molecular data and calibration ages contributed substantially to the posterior  
302 distribution of node ages (as seen in the difference between the “prior” and the “posterior” and “calibrated prior”  
303 distributions, respectively; Fig. 4); the posterior and calibrated prior distributions are strongly shifted to younger ages  
304 than the tree prior distribution. However, the posterior estimate of node 3 appears mostly influenced by the tree prior  
305 and to some extent by the calibration ages (calibrated prior). In contrast, the root age posterior differs substantially  
306 from both the tree prior and calibrated prior, suggesting that molecular data has a significant effect on the posterior  
307 distribution of Alstroemeriaceae crown age. Unsurprisingly, the Luzuriageae crown age is strongly influenced by the  
308 calibration ages (calibrated prior), as this is the node to which the fossil calibration was applied.

## 309 Biogeographic History of Alstroemeriaceae

310 We infer a combined southern South American and Australasian ( $PP = 0.24$ ), southern South American ( $PP = 0.19$ ),  
311 or Australasian ( $PP = 0.18$ ) origin of Alstroemeriaceae (Node 1, Fig. 5) during the Late Cretaceous. Subsequently,  
312 Alstroemeriaceae (Node 3, Fig. 5) moved in southern South America while Luzuriageae remained in the combined range  
313 until *Luzuriaga* and *Drymophila* diverged (Nodes 6 and 7, Fig. 5). *Bomarea* then began to move north, with the probability  
314 of an Andean ancestral range increasing through time until the ancestor of core *Bomarea* (Node 8, Fig. 5,  $pp = 1$ ).



## Untangling *Bomarea*

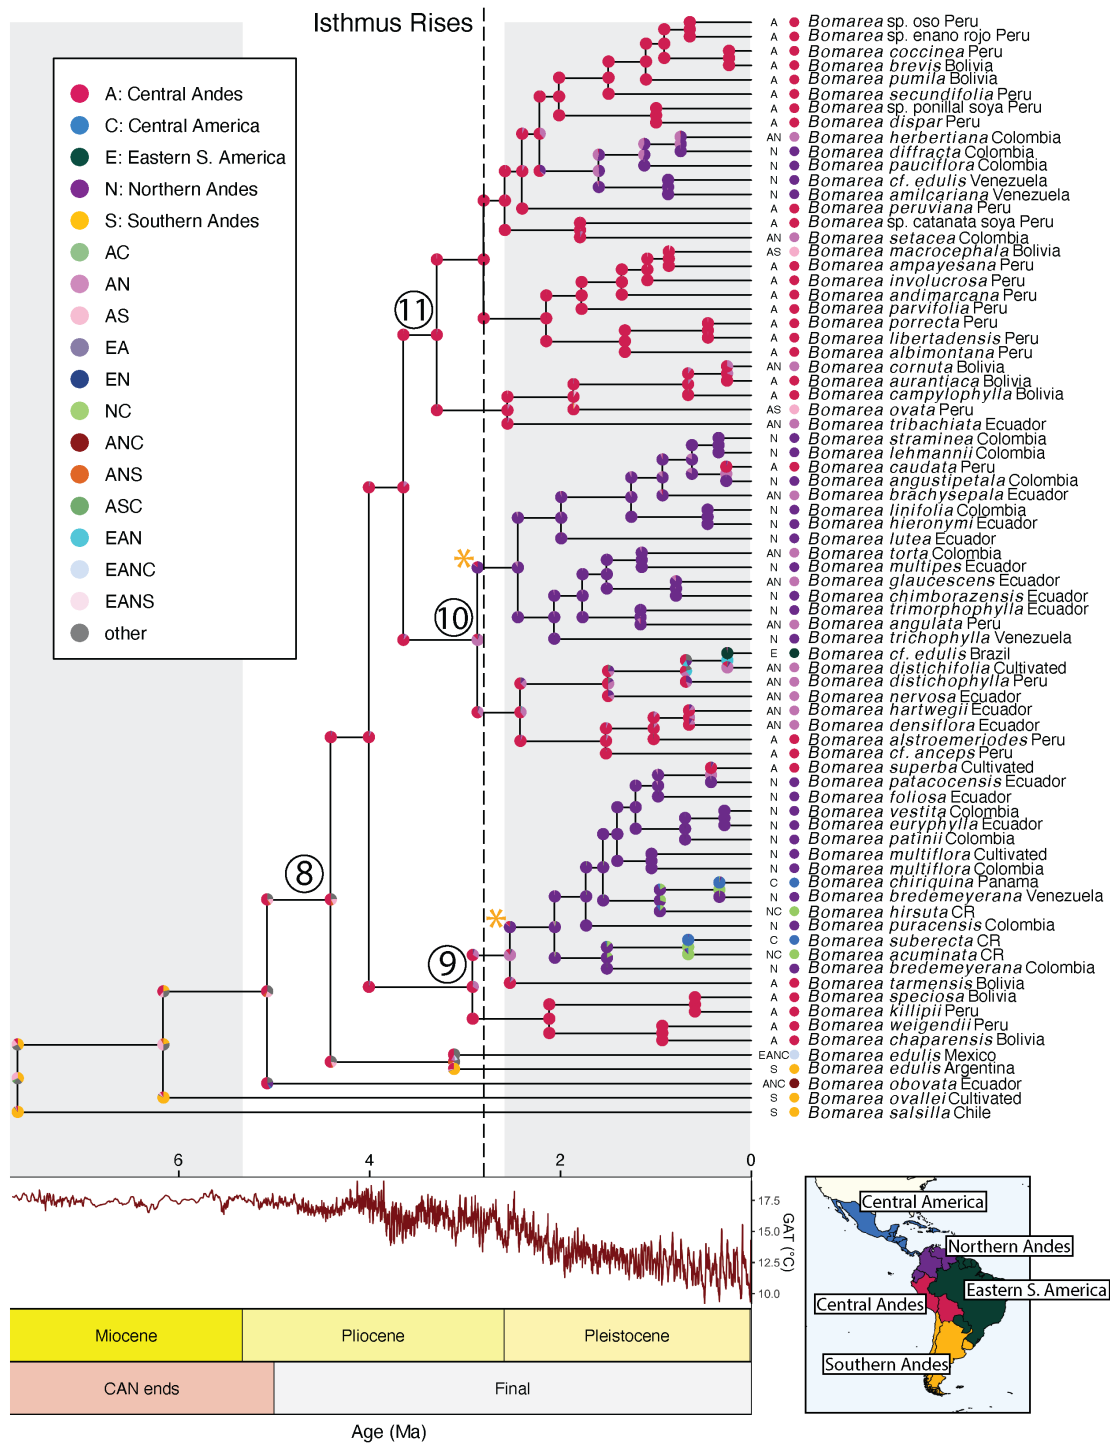

**Figure 6:** Chronogram of *Bomarea* showing estimated ancestral reconstruction of biogeographic ranges. X-axis includes (top) a reconstruction of global average temperature (GAT) over geological time (data from Tierney et al., 2020), (middle) geological epochs, and (bottom) stages of Andean uplift from Pérez-Escobar et al. (2022). Pie charts at nodes show the top three most probably ancestral states (color of the slices) and their corresponding posterior probabilities (size of the slices). Yellow stars indicate relevant cladogenetic events leading to northern Andean sub-clades. Inset map shows the five biogeographic regions.

## 315 **Biogeographic History of *Bomarea***

316 Within *Bomarea* we infer a southern South American ancestral range ( $pp = 0.38$ ), with additional support for a com-  
317 bined southern South American and central Andean range ( $pp = 0.32$ ). After *Bomarea salsilla* splits from the rest of  
318 *Bomarea*, we infer a combined range of southern South America, central Andes, northern Andes, eastern South Amer-  
319 ica, and Central America, followed by a cladogenetic split in which *Bomarea ovallei* moves into southern South America  
320 and the rest of *Bomarea* moves into the central Andes. We also infer a central Andean origin of the branch subtend-  
321 ing *Bomarea obovata* followed by range expansion into the northern Andes and Central America. Historical ranges of  
322 the *Bomarea edulis* clade are highly uncertain. We infer a combined central and southern Andean ancestor of *B. edulis*  
323 ( $pp = 0.24$ ), with a cladogenetic split of the range into southern Andean for the Argentina with particularly high  
324 uncertainty about how *B. edulis* spread to occupy all of South and Central America.

325 According to our results, core *Bomarea* originated in the Andes during the Pliocene, approximately 4.41 Ma. Three  
326 clades (nodes 9, 10, and 11 in Fig. 6) then diverge around the same time in the late Pliocene. In all three clades, disper-  
327 sal to and from the central and northern Andes explain most of the biogeographic reconstruction. Our results indicate  
328 that Clade 9 originated in the central Andes. A single cladogenetic dispersal event during the beginning of the Pleis-  
329 tocene (indicated by yellow star in Clade 9) led to the separation and subsequent diversification of a northern subclade  
330 within this lineage. Within the northern subclade, a single species (*Bomarea superba* Herb.) appears to have dispersed  
331 back to the central Andes. The phylogenetic placement of *B. superba* aligns nicely with its inferred affinities based on  
332 morphology; Hofreiter (2008) suggests that *B. superba* is more closely related to the northern Andean taxa than other  
333 Peruvian species. In addition, several lineages independently migrated further north into Central America (e.g., *Bo-*  
334 *marea chiriquina*, *Bomarea suberecta*). These Central American species appear to represent a combination of independent  
335 dispersal from northern South America and in situ diversification.

336 Clade 10 originated in a combined central and northern Andean range, followed by an immediate cladogenetic  
337 range split (indicated by yellow star in Clade 10) into a primarily northern subclade and a primarily central subclade.  
338 Within the northern subclade, a single dispersal event led to the establishment of one central Andean species (*Bomarea*  
339 *caudata*). Many of these northern subclade species grow in high-elevation páramo habitats with an erect growth form,  
340 including *Bomarea straminea* and *Bomarea lehmanii*. These two species are morphologically similar and sister species  
341 in the phylogeny, suggesting that they may be synonyms. The central subclade served as the source of one dispersal  
342 event into Eastern South America (*Bomarea cf. edulis*) and comprises several species with contiguous northern and  
343 central Andean ranges (e.g., *Bomarea distichifolia*, *B. distichophylla*).

344 Our results show that Clade 11 originated in the central Andes, where the majority of extant species within this  
345 lineage are still distributed. Within this lineage, there is a single anagenetic dispersal event leading to a northern  
346 Andean subclade (e.g., *Bomarea diffracta*) and several species with ranges that extend over multiple defined areas, either  
347 extending to include the central and northern Andes or the central and southern Andes. *Bomarea pauciflora* is also part  
348 of Clade 11, despite its strong morphological affinities to the erect and suberect species in clade 10 (e.g., *B. angustipetala*).

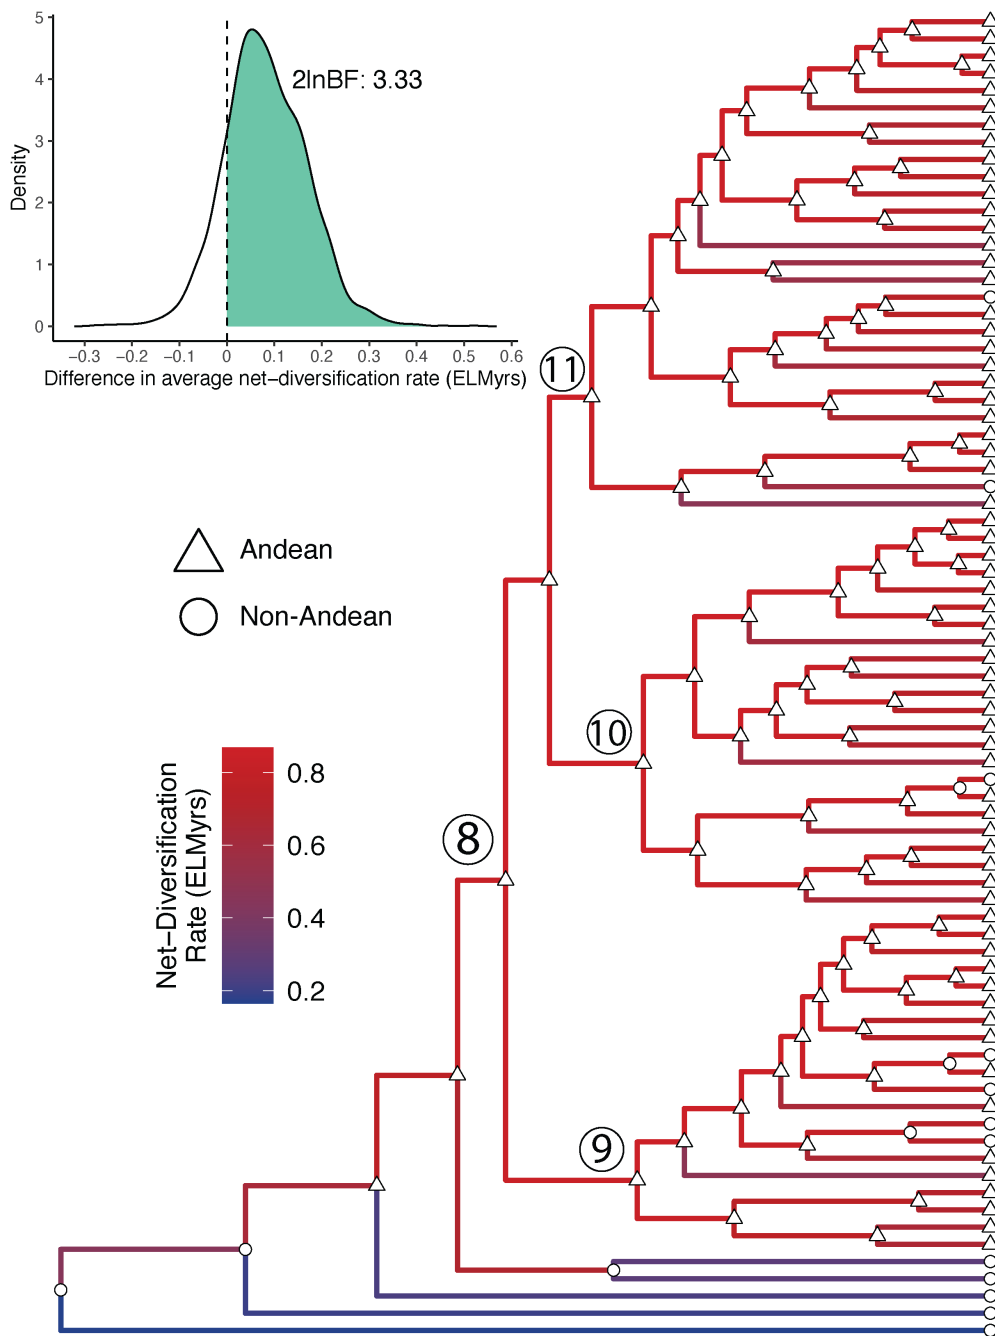

**Figure 7:** Branch-specific diversification rate estimation. The *Bomarea*-only chronogram has branches colored by estimated net-diversification rate. Node symbols represent if the node was estimated as Andean (northern or central Andean) or not in the above-described biogeographic analysis. The density plot shows the support for the average difference in net-diversification rate between Andean and non-Andean nodes in the tree, while accounting for uncertainty in the geographic state and branch rate estimates.

## 349 **Diversification-Rate Estimation**

350 Diversification rates in *Bomarea* increase in the core *Bomarea* clade (node 8)—the average rate in that clade is 0.78 events  
351 per lineage per million years (ELMyrs) versus 0.36 ELMyrs in the rest of the tree (Fig. 7). Rates are generally slower  
352 along the terminal branches of species in the grade (*B. salsilla*, *B. ovallei*, *B. obovata*, and *B. edulis*). We find that, on  
353 average, net-diversification rates are higher at Andean (0.74 ELMyrs) vs. non-Andean (0.665 ELMyrs) nodes, with  
354 moderate statistical support ( $2\ln\text{BF} = 3.51$ ).

## 355 **Discussion**

### 356 **Geological and climatic drivers of diversification and biogeography**

357 Our inference that Andean orogeny shaped both the north-to-south biogeographic history and the rapid diversifica-  
358 tion of *Bomarea* adds to a growing body of scholarship that links geological processes to biodiversity generation in the  
359 Americas. Current evidence suggests that fewer Andean plant lineages followed the south-to-north pattern of coloniza-  
360 tion than in-situ or north-to-south (Bacon et al., 2018). However, those groups that did spread south-to-north—such  
361 as *Puya* (Jabaily and Sytsma, 2013), wax palms (Sanín et al., 2016), *Chuquiraga* (Ezcurra, 2002), *Gunnera* (Bacon et al.,  
362 2018), and *Bomarea*—tracked the rise of the Andes and adapted to new habitats as they formed. Thus, we expect—and  
363 demonstrate—that orogenic events directly shaped how and when *Bomarea* spread north and diversified.

364 During *Bomarea*'s origin in the mid-Miocene, Andean orogenetic activity was concentrated in the Central Andes.  
365 By the mid-Pliocene, higher elevation habitats in the central Andes were well established. The climate had also begun  
366 to cool down from the middle Miocene Climatic Optimum, perhaps facilitating the evolution of colder-tolerant groups  
367 in the tropics, including those adapted to higher elevation tropical habitats such as cloud forests and alpine regions.  
368 Core-*Bomarea* diverged from the rest of the genus—and began to diversify in the central Andes—in the context of these  
369 environmental conditions: well-established central-Andean habitats and cooling temperatures

370 During the final stages of Andean uplift—which were concentrated in the northern Andes—*Bomarea* began to move  
371 into and diversify in that region. Within core *Bomarea*, we observe a general nested pattern of northward dispersal,  
372 with taxa dispersing from the central Andes, diversifying, and then dispersing farther north (or, rarely, to the east). The  
373 three main clades within core *Bomarea* (indicated by nodes 9, 10, and 11 in Fig. 6) originated in the central Andes or  
374 a widespread range that includes the central Andes. These clades then served as the source of multiple independent  
375 dispersal events to the northern Andes that, through subsequent diversification, led to the establishment of extant  
376 diversity in the northern Andes. In some cases, the central Andean region also served as the source of dispersal back  
377 south, leading to the establishment of species such as *Bomarea macrocephala* and *Bomarea ovata*, whose ranges extend into  
378 northern Argentina. The clades that established in the northern Andes then served as sources of later dispersal further  
379 north in Central America and, in one case, east into Brazil.

380 Central American *Bomarea* are highly phylogenetically clustered. Of the six Central American species included in  
381 our phylogeny, two are restricted to central America, two are distributed across Central America and the northern  
382 Andes, and two are widely distributed species (*B. edulis* and *B. obovata*) with a range that includes Central America.  
383 Apart from the two widely distributed species, all Central American taxa are placed in the northern South American  
384 subclade of clade 9. However, they appear to represent three independent dispersal events. First, *Bomarea chiriquina*  
385 appears to have moved into Central America from a widespread ancestor through cladogenetic range splitting—the  
386 other sister lineage stayed in northern South America (represented here by a Venezuelan *B. bredemeyerana* accession).  
387 Second, *Bomarea hirsuta* extended an ancestral northern South American range into Central America anagenetically.  
388 Third, the ancestor of *B. suberecta* and *B. acuminata* extended from a northern Andean range to a combined northern  
389 Andean and Central American range, which *B. acuminata* inherited while *B. suberecta* split into only Central America.  
390 This pattern indicates a possible predisposition of species from Clade 9 to migrate to and successfully establish in  
391 Central America. Further studies would be needed to investigate dispersal potential within this clade or physiological  
392 traits that might be associated with northern migration leading to establishment in Central America.

393 The rise of the isthmus of Panama occurred substantially (~2.3 million years or more) before the estimated dispersal  
394 events to Central America (O’Dea et al., 2016). We thus do not find evidence that the lack justy any terrestrial corridor  
395 directly limited *Bomarea*’s northward dispersal. Nonetheless, habitats available following the emergence of land may  
396 have continued to be inhospitable to a primarily montane lineage such as *Bomarea* for some time following the closure  
397 of a seaway passage. In fact, sea level dropped substantially from ~3 mya to ~1 mya, with relatively little change from  
398 1 mya to present (Fig. 1 from O’Dea et al., 2016), around when we first infer *Bomarea* dispersal events to Central America  
399 from northern South America. It is thus likely that *Bomarea*’s repeated colonization of Central America occurred only  
400 after sufficiently high-elevation habitat formed along the isthmus.

401 Most splits in the phylogeny appear to occur prior to the recent and rapid fluctuations in global temperature during  
402 the late Pleistocene (Pleistocene climatic oscillations), but it is possible that these rapid shifts in temperature, and the  
403 corresponding effects on habitat connectivity in alpine regions, may have reinforced species boundaries between some  
404 recently-diverged sister taxa such as *Bomarea coccinea* and *B. brevis*, which occur sympatrically in similar Peruvian cloud  
405 forests.

406 *Bomarea* diversification also appears tied to Andean uplift and climatic changes in the Pliocene and Pleistocene (Fig.  
407 6). Once *Bomarea* reached the central Andes, it began to diversify quite rapidly (Fig. 4); the 72 species in core *Bomarea*  
408 emerged over an approximately 4 million-year period. This diversification rate is comparable to the rates inferred for  
409 páramo plant lineages, which have higher diversification rates than those of groups in any other biodiversity hotspot  
410 (*Bomarea*’s net-diversification rate = 0.78; median estimate for páramo radiations = 0.73 Madriñán et al., 2013). We  
411 also show that, on average, within *Bomarea*, Andean lineages diversified faster than non-Andean ones: ancestral nodes  
412 reconstructed as Andean had higher average diversification rates (average difference = 0.08 ELMys), due to both the  
413 production of lineages that moved out of the Andes and to in situ diversification.

## 414 ***Bomarea edulis* monophyly**

415 While most *Bomarea edulis* individuals form a clade, a few individuals identified as *B. edulis* fall out separately (Campbell  
416 8900 and Bunting 4817—see below for discussion of these accessions). The monophyly of most *B. edulis* accessions  
417 indicates that the species' strikingly wide range is not due to taxonomic misclassification. Rather, the wide range  
418 appears to be “real,” perhaps caused by extensive geographic spread with limited morphological change since *B. edulis*  
419 split with core *Bomarea*, or, more plausibly, due to human influence. While our results do not directly address the role of  
420 pre-Columbian cultivation in the evolution and spread of *B. edulis*, the monophyly of (most) of our *B. edulis* accessions  
421 provides a starting point for future work that more closely examines finer-scale processes within this species.

422 Two individuals identified as *B. edulis* do not form a clade with the others. The first is Campbell 8900 from western  
423 Brazil. The only *Bomarea* species previously known to occur in Brazil is *B. edulis*, which is likely why Campbell 8900  
424 was identified as *B. edulis* despite striking morphological differences—Campbell 8900 has much larger leaves than does  
425 typical *B. edulis*. This accession may represent an undescribed taxon or the rarely collected *Bomarea ulei* Kraenzl; in the  
426 phylogeny it is nested in a clade of primarily combined central Andean and northern Andean taxa. This record thus  
427 represents a second *Bomarea* lineage to disperse to and establish in Brazil. The second accession (mis)identified as *B.*  
428 *edulis* is Bunting 4817 from Venezuela. This herbarium specimen has fruits but no flowers, making exact identification  
429 difficult. However, the locality and fruit morphology point to it being *Bomarea amilcariana* Stergios & Dorr, and indeed  
430 it falls out sister to *B. amilcariana* in the A-MSc phylogeny.

431 The *B. edulis* clade also includes a few specimens not identified as *B. edulis*. Of these, one is a specimen identified  
432 as *Bomarea dolichocarpa* Killip (Barbour 5069), and it could be a misidentified *B. edulis* as the two species are commonly  
433 confused when not in fruit (Hofreiter, 2006). Alternatively, its placement could indicate that *B. dolichocarpa* and *B. edulis*  
434 are conspecific, though the differences in their fruit shapes suggests that this is unlikely. The primarily *B. edulis* clade  
435 also includes an individual identified as a putative hybrid of *B. edulis* and *Bomarea acutifolia* (Tribble 79). None of the  
436 genetic evidence suggests a hybrid origin for this accession, so it is likely an atypical *B. edulis* rather than a hybrid.

437 We note that the unresolved taxonomy of many *Bomarea* species—including those brought to light in this study  
438 (e.g., *B. ulei*)—is a challenge for this type of work, as issues with synonymy and species boundaries directly affect  
439 the definition of taxonomic units for birth-death models and species ranges for biogeographic inference. We thus  
440 advocate for continued taxonomic work on this group given its potential as a model of the effect of geological events  
441 on biodiversity in the tropical Americas.

## 442 **Applying genome-scale data to recent rapid radiations**

443 We demonstrate the effectiveness of genome-scale data for phylogenetic inference of a recent and rapid radiation, but  
444 we also emphasize the importance of careful data curation and of using analytical methods appropriate for young and  
445 rapidly evolving clades.

446 Target capture methods are successful at generating genome-scale data for samples preserved in silica gel for DNA

447 extraction as well as older museum-preserved samples from herbaria (Dodsworth et al., 2019). Our Alstroemeriaceae  
448 dataset includes 74 tips from herbarium-sampled material. Herbarium samples enabled the dense taxonomic sampling  
449 in our study and allowed for the inclusion of rarely collected taxa, which provided the detail and power to resolve  
450 finer-scale biogeographic processes and diversification-rate estimates.

451 We found high levels of contaminant sequences and a large proportion of duplicated loci in our target capture  
452 dataset (see Results: Data Processing). Contaminant sequences can be common in such datasets, especially when de-  
453 rived from museum samples (Andermann et al., 2020), though we note that the levels of contamination we found  
454 were unusually high. Universal probe sets for target capture such as the GoFlag angiosperm 408 probes used in this  
455 study (Endara and Burleigh, 2022), Angiosperm 353 (Johnson et al., 2019), and ultraconserved elements (UCEs; Mc-  
456 Cormack et al., 2012) are designed to target sequences from an evolutionarily broad group of organisms and thus may  
457 be also more likely to recover contaminant sequences than clade-specific probe sets. Additionally, while the GoFlag  
458 angiosperm 408 probes (and most other universal probe sets) target single-copy nuclear genes, these regions were  
459 identified as single-copy at a broad evolutionary scale (all angiosperms), which cannot ensure that recent gene dupli-  
460 cations have not occurred within our target group (Frost and Lagomarsino, 2021). While one option may be to design  
461 more clade-specific probe sets, this is not feasible for many researchers—including for us in this study—and may negate  
462 the potential data-sharing benefits of global probe sets (depending on the way clade-specific probe sets are generated).

463 To address these concerns, we constructed and manually inspected gene trees for all loci used in this analysis. Our  
464 manual gene-tree inspection allowed us to identify potential contaminants, confirm sequence identity through blast  
465 (Altschul et al., 1990), and remove contaminant sequences, which were present in a significant proportion of loci (161  
466 of 221 loci). We also used manual gene-tree inspection to carefully tease apart the causes of putatively duplicated  
467 sequences—multiple sequences from one accession recovered for one locus. These duplicated sequences may contain  
468 information about gene duplication events that pertain to the entire locus and thus simply deleting duplicated acces-  
469 sions is not sufficient for guaranteeing orthology. Even accessions with only one recovered copy may have experienced  
470 the duplication, with only one copy recovered due to lower sequencing coverage. This concept is similar to the “hidden  
471 paralogs” discussed in Frost and Lagomarsino (2021). The authors point out that herbarium-derived data may be more  
472 prone to differential success in recovering paralogous loci, and the lack of duplicated copies may be hiding the fact that  
473 two sequences of two species are actually paralogous rather than homologous. Thus, we chose not to simply delete  
474 multiple copies when they occurred and instead to parse apart these loci using gene trees. By manually inspecting the  
475 gene trees of loci with duplicated copies, we were able to preserve most of these loci in the analysis. In some cases, we  
476 were able to split loci into two sets of homologous regions, increasing the amount of usable data. Together, these steps  
477 removed spurious sequences from the dataset and ensured that our loci represent homologous rather than paralogous  
478 sequences.

479 Our results also demonstrate the importance species-tree inference over concatenation approaches when rampant  
480 ILS is suspected. For each phylogeny with more than three tips, there are certain sets of parameter values that define an  
481 “anomaly zone” where the most likely gene tree is not equivalent to the true species tree (Rannala et al., 2020). Under

482 these parameter values, using a species tree inference method that does not account for ILS will generally infer an incor-  
483 rect topology. While the prevalence of this anomaly zone is unclear (Rannala et al., 2020), short branch lengths (common  
484 in our phylogeny) make gene tree-species tree conflict more likely (Maddison, 1997). The major backbone topology of  
485 *Bomarea* differs between our concatenated maximum likelihood analysis and our A-MSA analysis in ASTRAL-II (Fig.  
486 3), particularly in the relative positions of *B. obovata* and *B. edulis*. It is possible that using the ML topology would have  
487 significantly impacted our biogeographic inference, given the deep position of the changing node in the tree.

## 488 **Divergence time estimation uncertainty in macroevolutionary inferences**

489 Our approach emphasizes the importance of careful examination of node-based calibrations for divergence time esti-  
490 mation. The influence of prior specification on divergence time estimation has been well established (e.g., May et al.,  
491 2021), and previous studies have well-demonstrated issues with insufficient data for updating node-age priors (Brown  
492 and Smith, 2018). Thus, we examined the relative contributions of the tree prior and the temporal (fossil and secondary  
493 calibrations) and molecular data to the posterior node age estimates. Molecular data and secondary and fossil calibra-  
494 tions all contribute to our node age estimates, but the degree to which these sources of information update the tree  
495 prior varies depending on the node in question (Fig. 4). For example, our root age estimate is highly influenced by  
496 molecular data while the crown age of Alstroemerieae appears to be largely influenced by the tree prior. The ages of  
497 many nodes of the tree, especially the root and Luzuriageae and Alstroemerieae MRCAs, are highly uncertain. This  
498 analysis demonstrated the relatively weak influence of our data on the divergence times of some nodes, which gave us  
499 further impetus to incorporate temporal uncertainty in our biogeographic inferences.

## 500 **Conclusions**

501 In this study we produce the first well-sampled phylogeny of *Bomarea*, a charismatic tropical American plant clade, and  
502 demonstrate how major geographic and climatological events of the past 80 million years have shaped its colonization  
503 of new habitats and its diversification. In particular, *Bomarea's* origin in southern South America and its subsequent  
504 movement north as the Andes arose demonstrates how southern-temperate lineages have contributed to the outstand-  
505 ing diversity of tropical biomes today. We also illustrate how genome-scale data, museum-sampled material, and  
506 careful bioinformatic processing can expand our ability to infer evolutionary relationships and macroevolutionary pro-  
507 cesses. For understudied (often tropical) lineages, the steps we demonstrate allow for rigorous analyses in the face of  
508 fewer genomic resources and a dearth of well-preserved material, and thus this study may serve as a model for further  
509 work on tropical biodiversity generation.



## 510 Author Contributions

511 CMT designed and executed the study. CDS and CJR assistant with project design. CMT, FA-G, EG, and AV collected  
512 data. CMT and JGB performed analyses. CMT, FA-G, JGB, RZ-F, CDS, and CJR guided interpretation of results.

## 513 Acknowledgements

514 Fieldwork and sequencing costs were funded by grants from the American Society of Plant Taxonomists, the Pacific  
515 Bulb Society, the Garden Club of America, the Society of Systematic Biologists, The American Philosophical Society,  
516 the Torrey Botanical Society, the Tinker Foundation, and the Integrative Biology Department at UC Berkeley. CMT was  
517 supported by an NSF GRFP and NSF PRFB during this project.

518 The following herbaria graciously provided access to collections for destructive sampling: The Missouri Botanical  
519 Garden (MO), The New York Botanical Garden (NY), The Field Museum (F), the United States National Herbarium  
520 (SI), the University Herbarium (UC), the Herbario Nacional de México (MEX), and the National Herbarium of Victoria  
521 (MEL). The UC Botanical Garden, the San Francisco Botanical garden, and the Royal Botanic Gardens, Kew kindly  
522 provided access to living collections.

523 Marko Gomez, Victoria Sosa, Anahí Espinoza Jiménez, Josué Luna, Rafaél Torres, Luis Gerardo Hernandez San-  
524 dova, Yolanda Pantoja, Beatriz Velásquez, Don Ermelando, Carlos Durán, Pedro de la Cruz Salvador, José María  
525 de Jesús-Almirante, Oscar Dorado, Karime Díaz, Gerardo Cuevas, Jair Esteban López Reyes, Francisco Javier Ortiz  
526 Gorostieta, Daniela Gutijr, Enrique Florentino Lopez, Herbert Jassin Sarrazola Yepes, Carlos Felipe Bolaños-Sibaja,  
527 Pablo Gallego, and Jairo Hidalgo assisted with collections in the field.

528 We thank Michael R. May, Jenna B. Ekwealor, and the rest of the Rothfels lab *sensu lato* for their useful feedback on  
529 the manuscript.

## 530 References

531 Altschul, S. F., Gish, W., Miller, W., Myers, E. W., and Lipman, D. J. (1990). Basic local alignment search tool. *Journal of molecular biology*,  
532 215(3):403–410.

533 Alzate, F., Mort, M. E., and Ramirez, M. (2008a). Phylogenetic analyses of *emphBomarea* (Alstroemeriaceae) based on combined  
534 analyses of nrDNA ITS, psbA-trnH, rpoB-trnC and matK sequences. *Taxon*, 57(3):853–862.

535 Alzate, F., Quijano-Abril, M. A., and Morrone, J. J. (2008b). Panbiogeographical analysis of the genus *Bomarea* (Alstroemeriaceae).  
536 *Journal of Biogeography*, 35(7):1250–1257.

537 Alzate Guarín, F. (2005). *El género Bomarea (Alstroemeriaceae) en la flora de Colombia*. Colección Jorge Álvarez Lleras. Academia Colomb-  
538 biana de Ciencias Exactas, Físicas y Naturales.

- 539 Andermann, T., Torres Jiménez, M. F., Matos-Maraví, P., Batista, R., Blanco-Pastor, J. L., Gustafsson, A. L. S., Kistler, L., Liberal, I. M.,  
540 Oxelman, B., Bacon, C. D., et al. (2020). A guide to carrying out a phylogenomic target sequence capture project. *Frontiers in genetics*,  
541 page 1407.
- 542 Bacon, C. D., Velásquez-Puentes, F. J., Hinojosa, L. F., Schwartz, T., Oxelman, B., Pfeil, B., Arroyo, M. T., Wanntorp, L., and Antonelli,  
543 A. (2018). Evolutionary persistence in gunnera and the contribution of southern plant groups to the tropical andes biodiversity  
544 hotspot. *PeerJ*, 6:e4388.
- 545 Bedrick, E. J. and Tsai, C.-L. (1994). Model selection for multivariate regression in small samples. *Biometrics*, pages 226–231.
- 546 Breinholt, J. W., Carey, S. B., Tiley, G. P., Davis, E. C., Endara, L., McDaniel, S. F., Neves, L. G., Sessa, E. B., von Konrat, M., Chantanaor-  
547 rapint, S., et al. (2021). A target enrichment probe set for resolving the flagellate land plant tree of life. *Applications in plant sciences*,  
548 9(1):e11406.
- 549 Brown, J. W. and Smith, S. A. (2018). The past sure is tense: on interpreting phylogenetic divergence time estimates. *Systematic Biology*,  
550 67(2):340–353.
- 551 Ceccarelli, F. S., Ojanguren-Affilastro, A. A., Ramírez, M. J., Ochoa, J. A., Mattoni, C. I., and Prendini, L. (2016). Andean uplift drives  
552 diversification of the bothriurid scorpion genus *Brachistosternus*. *Journal of Biogeography*, 43(10):1942–1954.
- 553 Chacón, J., de Assis, M. C., Meerow, A. W., and Renner, S. S. (2012). From east Gondwana to Central America: historical biogeography  
554 of the Alstroemeriaceae. *Journal of Biogeography*, 39(10):1806–1818.
- 555 Chang, Z., Li, G., Liu, J., Zhang, Y., Ashby, C., Liu, D., Cramer, C. L., and Huang, X. (2015). Bridger: a new framework for de novo  
556 transcriptome assembly using rna-seq data. *Genome biology*, 16(1):1–10.
- 557 Chazot, N., De-Silva, D. L., Willmott, K. R., Freitas, A. V., Lamas, G., Mallet, J., Giraldo, C. E., Uribe, S., and Elias, M. (2018). Contrasting  
558 patterns of andean diversification among three diverse clades of neotropical clearwing butterflies. *Ecology and evolution*, 8(8):3965–  
559 3982.
- 560 Collen, B., Ram, M., Zamin, T., and McRae, L. (2008). The tropical biodiversity data gap: addressing disparity in global monitoring.  
561 *Tropical Conservation Science*, 1(2):75–88.
- 562 Deckmyn, A., Minka, T. P., Brownrigg, R., Becker, R. A., and Wilks, A. R. (2021). *maps: Draw Geographical Maps*.
- 563 Dodsworth, S., Pokorny, L., Johnson, M. G., Kim, J. T., Maurin, O., Wickett, N. J., Forest, F., and Baker, W. J. (2019). Hyb-seq for  
564 flowering plant systematics. *Trends in Plant Science*, 24(10):887–891.
- 565 Doyle, J. (1991). DNA protocols for plants. In *Molecular techniques in taxonomy*, pages 283–293. Springer.
- 566 Endara, L. and Burleigh, G. (202022). Angiosperm goflag probe set. *in prep*.
- 567 Ezcurra, C. (2002). Phylogeny, morphology, and biogeography of *Chuquiraga*, an Andean-Patagonian genus of Asteraceae-  
568 Barnadesioideae. *The Botanical Review*, 68(1):153–170.
- 569 Frost, L. and Lagomarsino, L. (2021). More-curated data outperforms more data: Treatment of cryptic and known paralogs improves  
570 phylogenomic analysis and resolves a northern andean origin of *freziera* (pentaphragmataceae). *bioRxiv*.

- 571 Funk, V. A. and Wagner, W. L. (1995). Biogeographic patterns in the Hawaiian Islands. *Hawaiian biogeography: evolution on a hot spot*  
572 *archipelago*.
- 573 Gelman, A. and Rubin, D. B. (1992). Inference from iterative simulation using multiple sequences. *Statistical science*, 7(4):457–472.
- 574 Giarla, T. C. and Esselstyn, J. A. (2015). The challenges of resolving a rapid, recent radiation: empirical and simulated phylogenomics  
575 of philippine shrews. *Systematic Biology*, 64(5):727–740.
- 576 Graham, A. (2009). The andes: a geological overview from a biological perspective. *Annals of the Missouri Botanical Garden*, 96(3):371–  
577 385.
- 578 Griffiths, A. R., Silman, M. R., Farfan-Rios, W., Feeley, K. J., Cabrera, K. G., Meir, P., Salinas, N., Segovia, R. A., and Dexter, K. G. (2021).  
579 Evolutionary diversity peaks at mid-elevations along an amazon-to-andes elevation gradient. *Frontiers in ecology and evolution*,  
580 pages NA–NA.
- 581 Guayasamin, J. M., Hutter, C. R., Tapia, E. E., Culebras, J., Peñafiel, N., Pyron, R. A., Morochz, C., Funk, W. C., and Arteaga, A. (2017).  
582 Diversification of the rainfrog *Pristimantis ornatissimus* in the lowlands and andean foothills of ecuador. *PloS one*, 12(3):e0172615.
- 583 Hazzi, N. A., Moreno, J. S., Ortiz-Movliav, C., and Palacio, R. D. (2018). Biogeographic regions and events of isolation and diversifica-  
584 tion of the endemic biota of the tropical andes. *Proceedings of the National Academy of Sciences*, 115(31):7985–7990.
- 585 Hennig, W. (1966). *Phylogenetic systematics*. Univ. of Illinois Press, Urbana, London.
- 586 Hoang, D. T., Chernomor, O., Von Haeseler, A., Minh, B. Q., and Vinh, L. S. (2018). Ufboot2: improving the ultrafast bootstrap  
587 approximation. *Molecular biology and evolution*, 35(2):518–522.
- 588 Hofreiter, A. (2005). The genus *Bomarea* (Alstroemeriaceae) in Bolivia and southern South America. *Harvard Papers in Botany*, pages  
589 343–374.
- 590 Hofreiter, A. (2006). *Bomarea edulis* (tussac) herb. a nearly forgotten pre-columbian cultivated plant and its closest relatives (alstroeme-  
591 riaceae). *Feddes Repertorium: Zeitschrift für botanische Taxonomie und Geobotanik*, 117(1-2):85–95.
- 592 Hofreiter, A. (2007). Biogeography and ecology of the alstroemeriaceae-luzuriagaceae clade in the high-mountain regions of central  
593 and south america. *Harvard Papers in Botany*, 12(2):259–284.
- 594 Hofreiter, A. (2008). A revision of *Bomarea* subgenus *Bomarea* s. str. section *Multiflorae* (alstroemeriaceae). *Systematic Botany*, 33(4):661–  
595 684.
- 596 Höhna, S., Freyman, W. A., Nolen, Z., Huelsenbeck, J., May, M. R., and Moore, B. R. (2019). A Bayesian approach for estimating  
597 branch-specific speciation and extinction Rates. *bioRxiv*, page 555805.
- 598 Höhna, S., Heath, T. A., Boussau, B., Landis, M. J., Ronquist, F., and Huelsenbeck, J. P. (2014). Probabilistic graphical model represen-  
599 tation in phylogenetics. *Systematic Biology*, 63(5):753–771.
- 600 Hoorn, C., Wesselingh, F. P., Ter Steege, H., Bermudez, M., Mora, A., Sevink, J., Sanmartín, I., Sanchez-Meseguer, A., Anderson, C.,  
601 Figueiredo, J., et al. (2010). Amazonia through time: Andean uplift, climate change, landscape evolution, and biodiversity. *science*,  
602 330(6006):927–931.

- 603 Hughes, C. and Eastwood, R. (2006). Island radiation on a continental scale: exceptional rates of plant diversification after uplift of  
604 the andes. *Proceedings of the National Academy of Sciences*, 103(27):10334–10339.
- 605 Iles, W. J., Smith, S. Y., Gandolfo, M. A., and Graham, S. W. (2015). Monocot fossils suitable for molecular dating analyses. *Botanical*  
606 *Journal of the Linnean Society*, 178(3):346–374.
- 607 Jabaily, R. S. and Sytsma, K. J. (2013). Historical biogeography and life-history evolution of andean puya (bromeliaceae). *Botanical*  
608 *Journal of the Linnean Society*, 171(1):201–224.
- 609 Johnson, M. G., Pokorny, L., Dodsworth, S., Botigue, L. R., Cowan, R. S., Devault, A., Eiserhardt, W. L., Epiawalage, N., Forest, F.,  
610 Kim, J. T., et al. (2019). A universal probe set for targeted sequencing of 353 nuclear genes from any flowering plant designed using  
611 k-medoids clustering. *Systematic biology*, 68(4):594–606.
- 612 Kalyaanamoorthy, S., Minh, B. Q., Wong, T. K., Von Haeseler, A., and Jermin, L. S. (2017). Modelfinder: fast model selection for  
613 accurate phylogenetic estimates. *Nature methods*, 14(6):587–589.
- 614 Katoh, K. and Standley, D. M. (2013). MAFFT multiple sequence alignment software version 7: improvements in performance and  
615 usability. *Molecular Biology and Evolution*, 30(4):772–780.
- 616 Koscinski, D., Handford, P., Tubaro, P. L., Sharp, S., and Lougheed, S. C. (2008). Pleistocene climatic cycling and diversification of the  
617 andean treefrog, *Hypsiboas andinus*. *Molecular Ecology*, 17(8):2012–2025.
- 618 Lagomarsino, L. P., Condamine, F. L., Antonelli, A., Mulch, A., and Davis, C. C. (2016). The abiotic and biotic drivers of rapid  
619 diversification in andean bellflowers (campanulaceae). *New Phytologist*, 210(4):1430–1442.
- 620 Lanfear, R., Frandsen, P. B., Wright, A. M., Senfeld, T., and Calcott, B. (2017). Partitionfinder 2: new methods for selecting partitioned  
621 models of evolution for molecular and morphological phylogenetic analyses. *Molecular biology and evolution*, 34(3):772–773.
- 622 Lisa De-Silva, D., Mota, L. L., Chazot, N., Mallarino, R., Silva-Brandão, K. L., Piñerez, L. M. G., Freitas, A. V., Lamas, G., Joron, M.,  
623 Mallet, J., et al. (2017). North andean origin and diversification of the largest ithomiine butterfly genus. *Scientific Reports*, 7(1):1–17.
- 624 Maddison, W. P. (1997). Gene trees in species trees. *Systematic biology*, 46(3):523–536.
- 625 Madriñán, S., Cortés, A. J., and Richardson, J. E. (2013). Páramo is the world’s fastest evolving and coolest biodiversity hotspot.  
626 *Frontiers in genetics*, 4:192.
- 627 May, M. R., Contreras, D. L., Sundue, M. A., Nagalingum, N. S., Looy, C. V., and Rothfels, C. J. (2021). Inferring the total-evidence  
628 timescale of marattialean fern evolution in the face of model sensitivity. *Systematic biology*, 70(6):1232–1255.
- 629 McCormack, J. E., Faircloth, B. C., Crawford, N. G., Gowaty, P. A., Brumfield, R. T., and Glenn, T. C. (2012). Ultraconserved elements  
630 are novel phylogenomic markers that resolve placental mammal phylogeny when combined with species-tree analysis. *Genome*  
631 *research*, 22(4):746–754.
- 632 Miller, M. A., Pfeiffer, W., and Schwartz, T. (2011). The cipes science gateway: a community resource for phylogenetic analyses. In  
633 *Proceedings of the 2011 TeraGrid Conference: extreme digital discovery*, pages 1–8.
- 634 Mongiardino Koch, N. (2021). Phylogenomic subsampling and the search for phylogenetically reliable loci. *Molecular biology and*  
635 *evolution*, 38(9):4025–4038.

- 636 Myers, N., Mittermeier, R. A., Mittermeier, C. G., Da Fonseca, G. A., and Kent, J. (2000). Biodiversity hotspots for conservation  
637 priorities. *Nature*, 403(6772):853–858.
- 638 Nguyen, L.-T., Schmidt, H. A., Von Haeseler, A., and Minh, B. Q. (2015). Iq-tree: a fast and effective stochastic algorithm for estimating  
639 maximum-likelihood phylogenies. *Molecular biology and evolution*, 32(1):268–274.
- 640 O’Dea, A., Lessios, H. A., Coates, A. G., Eytan, R. I., Restrepo-Moreno, S. A., Cione, A. L., Collins, L. S., De Queiroz, A., Farris, D. W.,  
641 Norris, R. D., et al. (2016). Formation of the isthmus of panama. *Science advances*, 2(8):e1600883.
- 642 Paradis, E. and Schliep, K. (2019). ape 5.0: an environment for modern phylogenetics and evolutionary analyses in R. *Bioinformatics*,  
643 35(3):526–528.
- 644 Pérez-Escobar, O. A., Zizka, A., Bermúdez, M. A., Meseguer, A. S., Condamine, F. L., Hoorn, C., Hooghiemstra, H., Pu, Y., Bogarín, D.,  
645 Boschman, L. M., et al. (2022). The andes through time: evolution and distribution of andean floras. *Trends in Plant Science*.
- 646 Plummer, M., Best, N., Cowles, K., and Vines, K. (2006). CODA: convergence diagnosis and output analysis for MCMC. *R news*,  
647 6(1):7–11.
- 648 R Core Team (2013). *R: A Language and Environment for Statistical Computing*. R Foundation for Statistical Computing, Vienna, Austria.
- 649 Rannala, B., Edwards, S. V., Leaché, A., and Yang, Z. (2020). The multi-species coalescent model and species tree inference.
- 650 Ree, R. H. and Smith, S. A. (2008). Maximum likelihood inference of geographic range evolution by dispersal, local extinction, and  
651 cladogenesis. *Systematic biology*, 57(1):4–14.
- 652 Ribas, C. C., Moyle, R. G., Miyaki, C. Y., and Cracraft, J. (2007). The assembly of montane biotas: linking andean tectonics and  
653 climatic oscillations to independent regimes of diversification in pionus parrots. *Proceedings of the Royal Society B: Biological Sciences*,  
654 274(1624):2399–2408.
- 655 Sanín, M. J., Kissling, W. D., Bacon, C. D., Borchsenius, F., Galeano, G., Svenning, J.-C., Olivera, J., Ramírez, R., Trénel, P., and  
656 Pintaud, J.-C. (2016). The Neogene rise of the tropical Andes facilitated diversification of wax palms (*Ceroxylon*: Areaceae) through  
657 geographical colonization and climatic niche separation. *Botanical Journal of the Linnean Society*, 182(2):303–317.
- 658 Simpson, B. B. (1975). Pleistocene changes in the flora of the high tropical andes. *Paleobiology*, 1(3):273–294.
- 659 Sklenář, P., Dušková, E., and Balslev, H. (2011). Tropical and temperate: evolutionary history of páramo flora. *The Botanical Review*,  
660 77(2):71–108.
- 661 Tierney, J. E., Poulsen, C. J., Montañez, I. P., Bhattacharya, T., Feng, R., Ford, H. L., Hönisch, B., Inglis, G. N., Petersen, S. V., Sahoo, N.,  
662 et al. (2020). Past climates inform our future. *Science*, 370(6517):eaay3701.
- 663 Titley, M. A., Snaddon, J. L., and Turner, E. C. (2017). Scientific research on animal biodiversity is systematically biased towards  
664 vertebrates and temperate regions. *PLoS one*, 12(12):e0189577.
- 665 Tribble, C. M., Freyman, W. A., Landis, M. J., Lim, J. Y., Barido-Sottani, J., Kopperud, B. T., Hhna, S., and May, M. R. (2022). Revgadgets:  
666 an r package for visualizing bayesian phylogenetic analyses from revbayes. *Methods in Ecology and Evolution*, 13(2):314–323.

- 667 Tribble, C. M., Martínez-Gómez, J., Alzate-Guarín, F., Rothfels, C. J., and Specht, C. D. (2021a). Comparative transcriptomics of a mono-  
668 cotyledonous geophyte reveals shared molecular mechanisms of underground storage organ formation. *Evolution & Development*,  
669 23(3):155–173. Invited contribution to special issue: Plant Evolution & Development.
- 670 Tribble, C. M., Martínez-Gómez, J., Howard, C. C., Males, J., Sosa, V., Sessa, E. B., Cellinese, N., and Specht, C. D. (2021b). Get the  
671 shovel: morphological and evolutionary complexities of belowground organs in geophytes. *American Journal of Botany*, 108(3):372–  
672 387.
- 673 von Hagen, K. B. and Kadereit, J. W. (2001). The phylogeny of gentianella (gentianaceae) and its colonization of the southern hemi-  
674 sphere as revealed by nuclear and chloroplast dna sequence variation. *Organisms Diversity & Evolution*, 1(1):61–79.
- 675 Von Humboldt, A. and Bonpland, A. (1807). *Ideen zu einer Geographie der Pflanzen nebst einem Naturgemälde der Tropenländer: auf*  
676 *Beobachtungen und Messungen gegründet, welche vom 10ten Grade nördlicher bis zum 10ten Grade südlicher Breite, in den Jahren 1799,*  
677 *1800, 1801, 1802 und 1803 angestellt worden sind*, volume 1. Cotta.
- 678 Wallace, A. R. (1863). On the physical geography of the malay archipelago. *The Journal of the Royal Geographical Society of London*,  
679 33:217–234.
- 680 WCSP (2020). World checklist of selected plant families, facilitated by the Royal Botanic Gardens, Kew. [http://wcsp.science.kew.](http://wcsp.science.kew.org)  
681 [org](http://wcsp.science.kew.org). Accessed: 2020-05-02.
- 682 Wickham, H. (2011). ggplot2. *Wiley Interdisciplinary Reviews: Computational Statistics*, 3(2):180–185.
- 683 Yang, Z. and Rannala, B. (2006). Bayesian estimation of species divergence times under a molecular clock using multiple fossil  
684 calibrations with soft bounds. *Molecular biology and evolution*, 23(1):212–226.
- 685 Yu, G., Smith, D. K., Zhu, H., Guan, Y., and Lam, T. T.-Y. (2017). ggtree: an R package for visualization and annotation of phylogenetic  
686 trees with their covariates and other associated data. *Methods in Ecology and Evolution*, 8(1):28–36.
- 687 Zhang, C., Rabiee, M., Sayyari, E., and Mirarab, S. (2018). Astral-iii: polynomial time species tree reconstruction from partially resolved  
688 gene trees. *BMC bioinformatics*, 19(6):15–30.
